# Supplementary material for: Searching and designing potential inhibitors for SARS-CoV-2 Mpro from natural sources using atomistic and deep-learning calculations
Source: Royal Society of Chemistry journal article supplement (doi:10.1039/d1ra06534c), 2021-01-01
Supplement: d1ra06534c1.pdf [file d1ra06534c1.pdf]

# Searching and Designing Potential Inhibitors for SARS-CoV-2 Mpro from Natural Sources using Atomistic and Deep-Learning Calculations

Nguyen Minh Tam,<sup>ab</sup> Duc-Hung Pham,<sup>c</sup> Dinh Minh Hiep,<sup>d</sup> Phuong-Thao Tran,<sup>e</sup> Duong Tuan Quang,<sup>f</sup>  
and Son Tung Ngo<sup>bg\*</sup>

<sup>a</sup>*Computational Chemistry Research Group, Ton Duc Thang University, Ho Chi Minh City 72915, Vietnam*

<sup>b</sup>*Faculty of Applied Sciences, Ton Duc Thang University, Ho Chi Minh City 72915, Vietnam*

<sup>c</sup>*Division of Immunobiology, Cincinnati Children's Hospital Medical Center, Cincinnati, Ohio 45229, United States*

<sup>d</sup>*Department of Agriculture and Rural Development, Ho Chi Minh City 71007, Vietnam*

<sup>e</sup>*Hanoi University of Pharmacy, Hanoi 11021, Vietnam*

<sup>f</sup>*Department of Chemistry, Hue University, Hue City, Thua Thien Hue Province, Vietnam*

<sup>g</sup>*Laboratory of Theoretical and Computational Biophysics, Ton Duc Thang University, Ho Chi Minh City 72915, Vietnam*

\*Email: [ngosontung@tdtu.edu.vn](mailto:ngosontung@tdtu.edu.vn)

**Table S1.** Docking results of natural compounds.

| No. | Compound | PubChem ID | Name                           | Organism                | $\Delta G_{Dock}$ |
|-----|----------|------------|--------------------------------|-------------------------|-------------------|
| 1   | T14      | 65071      | Limonin                        | Citrus                  | -8.9              |
| 2   | T82      | 28523      | Tomatine                       | Tomato                  | -8.9              |
| 3   | T13      | 5281600    | Amentoflavone                  | Garcinia brasiliensis   | -8.6              |
| 4   | T3       | 5281627    | Hinokiflavone                  | Rhus succedanea         | -8.6              |
| 5   | T180     | 98570      | Allocryptopine                 | Glaucium arabicum       | -8.4              |
| 6   | T25      | 31310      | Scillaren A                    | Scilla maritima         | -8.3              |
| 7   | T11      | 5154       | Sanguinarine                   | Argemone mexicana       | -8.2              |
| 8   | T26      | 222154     | Proscillaridin                 | Scilla maritima         | -8.2              |
| 9   | T107     | 4970       | Protopine                      | Corydalis ambigua       | -8.1              |
| 10  | T20      | 167691     | Peiminine                      | Fritillaria roylei      | -8.1              |
| 11  | T52      | 441840     | Adynerin                       | Nerium oleander         | -8.1              |
| 12  | T61      | 73568      | Corilagin                      | Sapium sebiferum        | -8.1              |
| 13  | T65      | 131900     | Peimine                        | Fritillaria roylei      | -8.1              |
| 14  | T121     | 32024      | Alpha-antiarin                 | Antiaris toxicaria      | -7.9              |
| 15  | T202     | 441295     | Ginkgolide_C                   | Ginkgo biloba           | -7.9              |
| 16  | T24      | 5317157    | Equisetrin                     | Equisetum arvense       | -7.9              |
| 17  | T56      | 10175330   | Tribuloside                    | Tribulus terrestris     | -7.9              |
| 18  | T19      | 10028469   | Melianodiol                    | Melia azedarach         | -7.8              |
| 19  | T27      | 11013      | Rhodexin A                     | Rohdea japonica         | -7.8              |
| 20  | T35      | 3083631    | Chlorogenin                    | Tribulus terrestris     | -7.8              |
| 21  | T50      | 119041     | Obacunone                      | Phellodendron amurense  | -7.8              |
| 22  | T102     | 442814     | Pachyrrhizone                  | Pachyrhizus erosus      | -7.7              |
| 23  | T115     | 15515703   | Jujubogenin                    | Ziziphus jujuba         | -7.7              |
| 24  | T117     | 5282160    | Quercimeritrin                 | Hibiscus mutabilis      | -7.7              |
| 25  | T179     | 73432      | Brusatol                       | Brucea javanica         | -7.7              |
| 26  | T17      | 159331     | Thevetine                      | Thevetia peruviana      | -7.7              |
| 27  | T182     | 3032482    | Ecdysterone                    | Achyranthes bidentata   | -7.7              |
| 28  | T1       | 31342      | Solasodine                     | Solanum xanthocarpum    | -7.7              |
| 29  | T23      | 72307      | Sesamin                        | Acanthopanax aculeatus  | -7.7              |
| 30  | T33      | 185586     | Melianotriol                   | Melia azedarach         | -7.7              |
| 31  | T34      | 185617     | Scutellarin                    | Scutellaria baicalensis | -7.7              |
| 32  | T55      | 5316647    | Cynarine                       | Asteraceae              | -7.7              |
| 33  | T7       | 5270604    | Taraxasterol                   | Centipeda minima        | -7.7              |
| 34  | T8       | 91453      | Hecogenin                      | Agave americana         | -7.7              |
| 35  | T126     | 5280805    | Rutin                          | Sophora japonica        | -7.6              |
| 36  | T30      | 470259     | Arnidiol                       | Centipeda minima        | -7.6              |
| 37  | T44      | 6325292    | Gomphrenin_III                 | Gomphrena globosa       | -7.6              |
| 38  | T4       | 15560423   | Kulactone                      | Melia azedarach         | -7.6              |
| 39  | T58      | 10494      | Oleanolic acid                 | Achyranthes bidentata   | -7.6              |
| 40  | W17      | 3000706    | Valinomycin                    | Streptomyces            | -7.6              |
| 41  | T119     | 65064      | (-)-epigallocatechin 3-gallate | Green tea               | -7.5              |

|    |      |           |                                |                            |      |
|----|------|-----------|--------------------------------|----------------------------|------|
| 42 | T114 | 472761    | Tirucalol                      | Euphorbia thymifolia       | -7.5 |
| 43 | T120 | 163776    | Ginkgolide J                   | Ginkgo biloba              | -7.5 |
| 44 | T166 | 5281867   | Savinin                        | Acanthopanax aculeatus     | -7.5 |
| 45 | T207 | 5281643   | Hyperin                        | Polygonum hydropiper       | -7.5 |
| 46 | T228 | 9851101   | Toosendanin                    | Melia azedarach            | -7.5 |
| 47 | T29  | 73145     | Beta-amyrin                    | Euphorbia antiquorum       | -7.5 |
| 48 | T42  | 441867    | Neriifolin                     | Thevetia peruviana         | -7.5 |
| 49 | T5   | 92095     | Sarsasapogenin                 | Smilax glabra              | -7.5 |
| 50 | T84  | 99516     | Tigogenin                      | Agave americana            | -7.5 |
| 51 | T88  | 112500418 | Amaranthin                     | Gomphrena globosa          | -7.5 |
| 52 | T89  | 5280441   | Vitexin                        | Crotalaria mucronata       | -7.5 |
| 53 | T10  | 5318868   | Kulolactone                    | Melia azedarach            | -7.4 |
| 54 | T116 | 5281807   | Puerarin                       | Pueraria thomsoni          | -7.4 |
| 55 | T162 | 442015    | Columbin                       | Tinospora sagittata        | -7.4 |
| 56 | T28  | 73073     | Serpentine                     | Rauwolfia serpentina       | -7.4 |
| 57 | T2   | 99474     | Diosgenin                      | Schizocapsa plantaginea    | -7.4 |
| 58 | T64  | 124061    | Sophoradiol                    | Sophora japonica           | -7.4 |
| 59 | T6   | 160270    | Dracorubin                     | Daemonorops draco          | -7.4 |
| 60 | T83  | 64945     | Ursolic acid                   | Lamiaceae                  | -7.4 |
| 61 | K9   | 53481915  | Adenosine thiamine diphosphate | Cordyceps                  | -7.3 |
| 62 | T108 | 5770      | Reserpine                      | Rauwolfia serpentina       | -7.3 |
| 63 | T12  | 92097     | Taraxerol                      | Taraxacum officinale       | -7.3 |
| 64 | T161 | 441828    | Inokosterone                   | Achyranthes bidentata      | -7.3 |
| 65 | T169 | 6419993   | Ginkgolide A                   | Ginkgo biloba              | -7.3 |
| 66 | T174 | 5490064   | Avicularin                     | Polygonum aviculare        | -7.3 |
| 67 | T209 | 6325730   | Neocycasin D                   | Cycas revoluta             | -7.3 |
| 68 | T21  | 5319341   | Melianol                       | Melia azedarach            | -7.3 |
| 69 | T38  | 5281847   | Rottlerin                      | Mallotus philippinensis    | -7.3 |
| 70 | T39  | 5318070   | Holarrhenine                   | Holarrhena antidysenterica | -7.3 |
| 71 | T40  | 5320199   | Noracronycine                  | Glycosmis pentaphylla      | -7.3 |
| 72 | T47  | 14749     | Carminic acid                  | Laccifer lacca             | -7.3 |
| 73 | T111 | 72326     | Betulin                        | Sophora japonica           | -7.2 |
| 74 | T124 | 14833699  | Canavalia gibberellin I        | Canavalia gladiata         | -7.2 |
| 75 | T128 | 6451060   | Ovatodiolide                   | Anisomeles ovata           | -7.2 |
| 76 | T135 | 6324617   | Ginkgolide B                   | Ginkgo biloba              | -7.2 |
| 77 | T137 | 160006    | Bruceine A                     | Brucea javanica            | -7.2 |
| 78 | T16  | 382580    | Cycloartenol                   | Euphorbia antiquorum       | -7.2 |
| 79 | T192 | 5280804   | Isoquercitrin                  | Equisetum arvense          | -7.2 |
| 80 | T217 | 161496    | Bruceine B                     | Brucea javanica            | -7.2 |
| 81 | T37  | 5280704   | Cosmosiine                     | Euphorbia thymifolia       | -7.2 |
| 82 | T43  | 503737    | Liquiritin                     | Glycyrrhiza uralensis      | -7.2 |
| 83 | T46  | 6758      | Rotenone                       | Pachyrhizus erosus         | -7.2 |
| 84 | T60  | 73299     | Hederagenin                    | Aristolochiaceae           | -7.2 |

|     |      |           |                          |                           |      |
|-----|------|-----------|--------------------------|---------------------------|------|
| 85  | T68  | 5281647   | Mangiferin               | Mangifera indica          | -7.2 |
| 86  | T72  | 44559213  | Glochidiol               | Glochidion eriocarpum     | -7.2 |
| 87  | T79  | 5281813   | Wedelolactone            | Wedelia calendulacea      | -7.2 |
| 88  | T93  | 44559215  | Glochidonol              | Glochidion eriocarpum     | -7.2 |
| 89  | W12  | 122844    | Betulonic acid           | Liquidambar formosana     | -7.2 |
| 90  | T101 | 44567124  | Kulinone                 | Melia azedarach           | -7.1 |
| 91  | T141 | 5281810   | Tectoridin               | Belamcanda chinensis      | -7.1 |
| 92  | T15  | 174863    | Lactucopicrin            | Lactuca indica            | -7.1 |
| 93  | T170 | 10211     | Byakangelicin            | Angelica dahurica         | -7.1 |
| 94  | T31  | 10246509  | Berberine                | Argemone mexicana         | -7.1 |
| 95  | T41  | 160644    | Liensinine               | Nelumbo nucifera          | -7.1 |
| 96  | T70  | 5458462   | Cycloartocarpin          | Artocarpus heterophyllus  | -7.1 |
| 97  | T109 | 64971     | Betulinic acid           | Ziziphus jujuba           | -7   |
| 98  | T167 | 5318980   | Icaritin                 | Herba epimedii            | -7   |
| 99  | T198 | 10607     | Podophyllotoxin          | Podophyllum tonkinense    | -7   |
| 100 | T66  | 151289    | Evodiamine               | Evodia rutaecarpa         | -7   |
| 101 | T80  | 6452523   | Corybulbine              | Corydalis ambigua         | -7   |
| 102 | T81  | 12314446  | Tumulosic acid           | Poria cocos               | -7   |
| 103 | T99  | 72323     | Jatrorrhizine            | Fibraurea tinctoria       | -7   |
| 104 | W13  | 442879    | Hinokinin                | Aristolochia odoratissima | -7   |
| 105 | T105 | 11968340  | Carthamin                | Carthamus tinctorius      | -6.9 |
| 106 | T106 | 54676038  | Dicumarol                | Melilotus suaveolens      | -6.9 |
| 107 | T142 | 5281855   | Ellagic acid             | Terminalia chebula        | -6.9 |
| 108 | T160 | 73337     | Magnoflorine             | Herba epimedii            | -6.9 |
| 109 | T36  | 6325294   | Gomphrenin V             | Gomphrena globosa         | -6.9 |
| 110 | T48  | 73078     | Tetrandrine              | Radix stephaniae          | -6.9 |
| 111 | T49  | 114909    | Tephrosin                | Pachyrhizus erosus        | -6.9 |
| 112 | W9   | 47936     | Forskolin                | Plectranthus barbatus     | -6.9 |
| 113 | K41  | 5326875   | Biotinyl-5'-AMP          | Cordyceps                 | -6.8 |
| 114 | T123 | 442514    | Hematoxylin              | Caesalpinia sappan        | -6.8 |
| 115 | T130 | 135403802 | Hematein                 | Caesalpinia sappan        | -6.8 |
| 116 | T139 | 5280445   | Luteolin                 | Lonicera japonica         | -6.8 |
| 117 | T150 | 345501    | Deoxypodophyllotoxin     | Podophyllum tonkinense    | -6.8 |
| 118 | T151 | 441080    | Ajmaline                 | Rauwolfia serpentina      | -6.8 |
| 119 | T152 | 14833701  | Canavalia gibberellin II | Canavalia gladiata        | -6.8 |
| 120 | T158 | 64981     | Arctigenin               | Arctium lappa             | -6.8 |
| 121 | T171 | 5280343   | Quercetin                | Prunus armeniaca          | -6.8 |
| 122 | T173 | 5384083   | Bruceine C               | Brucea javanica           | -6.8 |
| 123 | T188 | 11870307  | Chlorogenic acid         | Boehmeria nivea           | -6.8 |
| 124 | T194 | 5281672   | Myricetin                | Thuja orientalis          | -6.8 |
| 125 | T216 | 88708     | Gentiopicrin             | Gentiana scabra           | -6.8 |
| 126 | T220 | 9576780   | Macrozamin               | Cycas revoluta            | -6.8 |
| 127 | T22  | 65752     | Rutecarpine              | Evodia rutaecarpa         | -6.8 |

|     |      |          |                                |                            |      |
|-----|------|----------|--------------------------------|----------------------------|------|
| 128 | T32  | 73191    | Nodakenin                      | Peucedanum decursivum      | -6.8 |
| 129 | T62  | 100528   | Arctiin                        | Arctium lappa              | -6.8 |
| 130 | W14  | 44427466 | 4,4'-O-benzoylisolariciresinol | Chamaecyparis obtusa       | -6.8 |
| 131 | W16  | 4477     | Niclosamide                    | Mammalian mitochondria     | -6.8 |
| 132 | T100 | 101301   | Corydaline                     | Corydalis ambigua          | -6.7 |
| 133 | T110 | 68827    | Artemisinine                   | Artemisia annua            | -6.7 |
| 134 | T112 | 72378    | Lycorine                       | Narcissus tazetta          | -6.7 |
| 135 | T131 | 10207    | Aloe Emodin                    | Rheum rhabarbarum          | -6.7 |
| 136 | T140 | 5281612  | Diosmetin                      | Capsella bursa-pastori     | -6.7 |
| 137 | T146 | 6293     | Alizarin                       | Rubia cordifolia           | -6.7 |
| 138 | T185 | 5320070  | Neocycasin C                   | Cycas revoluta             | -6.7 |
| 139 | T187 | 6450453  | Anomalin                       | Angelica dahurica          | -6.7 |
| 140 | T200 | 73467    | Verbenalin                     | Verbena officinalis        | -6.7 |
| 141 | T214 | 12305761 | Barbaloin                      | Aloe                       | -6.7 |
| 142 | T221 | 22524404 | Neocycasin B                   | Cycas revoluta             | -6.7 |
| 143 | T239 | 5320072  | Neocycasin E                   | Cycas revoluta             | -6.7 |
| 144 | T248 | 6167     | Colchicine                     | Colchicum autumnale        | -6.7 |
| 145 | T57  | 3503     | Gossypol                       | Gossypium                  | -6.7 |
| 146 | T75  | 10144    | Liriodenine                    | Nelumbo nucifera           | -6.7 |
| 147 | T85  | 119204   | Roemerine                      | Nelumbo nucifera           | -6.7 |
| 148 | T86  | 76330309 | Conckurchine                   | Holarrhena antidysenterica | -6.7 |
| 149 | T87  | 5321206  | Sebiferic acid                 | Sapium sebiferum           | -6.7 |
| 150 | T91  | 11854305 | beta-Elemonic acid             | Poria cocos                | -6.7 |
| 151 | T92  | 22524408 | Neocycasin G                   | Cycas revoluta             | -6.7 |
| 152 | T94  | 3220     | Emodin                         | Rheum rhabarbarum          | -6.7 |
| 153 | T96  | 10639    | Physcione                      | Cassia occidentalis        | -6.7 |
| 154 | W7   | 2751794  | 6,7-Dehydroroyleanone          | Tetradenia riparia         | -6.7 |
| 155 | T129 | 12308618 | Artocarpetin                   | Artocarpus heterophyllus   | -6.6 |
| 156 | T138 | 222515   | Brasilin                       | Caesalpinia sappan         | -6.6 |
| 157 | T218 | 5274587  | Lotusine                       | Nelumbo nucifera           | -6.6 |
| 158 | T223 | 5281408  | Rhynchophylline                | Uncaria rhynchophylla      | -6.6 |
| 159 | T224 | 5281756  | Mucronatine                    | Crotalaria mucronata       | -6.6 |
| 160 | T53  | 614726   | Lycorin                        | Crinum asiaticum           | -6.6 |
| 161 | T69  | 5316036  | Conessimine                    | Holarrhena antidysenterica | -6.6 |
| 162 | T71  | 5484385  | Pachymic acid                  | Poria cocos                | -6.6 |
| 163 | T90  | 5458461  | Artocarpin                     | Artocarpus heterophyllus   | -6.6 |
| 164 | T9   | 114917   | Tanshinone                     | Salvia miltiorrhiza        | -6.6 |
| 165 | K2   | 5375662  | 9-(beta-D-Ribofuranosyl)zeatin | Cordyceps                  | -6.5 |
| 166 | K7   | 44123306 | Adenosine 5'-propyl phosphate  | Cordyceps                  | -6.5 |
| 167 | T103 | 5281605  | Baicalein                      | Scutellaria baicalensis    | -6.5 |
| 168 | T113 | 160597   | Anonaine                       | Annona squamosa            | -6.5 |
| 169 | T122 | 72301    | Hyndarine                      | Stephania rotunda          | -6.5 |
| 170 | T133 | 41169    | Nornuciferine                  | Nelumbo nucifera           | -6.5 |

|     |      |           |                                               |                            |      |
|-----|------|-----------|-----------------------------------------------|----------------------------|------|
| 171 | T143 | 54684703  | Equisetin                                     | Equisetum arvense          | -6.5 |
| 172 | T175 | 6713959   | Gelsemine                                     | Gelsemium elegans          | -6.5 |
| 173 | T186 | 6436877   | Agathic acid                                  | Erythrophleum fordii       | -6.5 |
| 174 | T193 | 5280863   | Kaempferol                                    | Ginkgo biloba              | -6.5 |
| 175 | T203 | 200480    | Pronuciferine                                 | Nelumbo nucifera           | -6.5 |
| 176 | T206 | 3055167   | Byakangelicol                                 | Angelica dahurica          | -6.5 |
| 177 | T51  | 441082    | Conessine                                     | Holarrhena antidysenterica | -6.5 |
| 178 | T77  | 353825    | Graveoline                                    | Ruta graveolens            | -6.5 |
| 179 | W3   | 94162     | Sugiol                                        | Calocedrus formosana       | -6.5 |
| 180 | K15  | 20849086  | Succinyladenosine                             | Cordyceps                  | -6.4 |
| 181 | T118 | 5320073   | Neocycasin F                                  | Cycas revoluta             | -6.4 |
| 182 | T125 | 5280443   | Apigenin                                      | Selaginella tamariscina    | -6.4 |
| 183 | T172 | 5281666   | Kaempferide                                   | Alpinia officinarum        | -6.4 |
| 184 | T176 | 10146     | Nuciferine                                    | Nelumbo nucifera           | -6.4 |
| 185 | T184 | 5281654   | Isorhamnetin                                  | Polygonum hydropiper       | -6.4 |
| 186 | T196 | 5320945   | Rhamnazin                                     | Polygonum hydropiper       | -6.4 |
| 187 | T201 | 98608     | Phellopterin                                  | Angelica dahurica          | -6.4 |
| 188 | T45  | 11772257  | Isoconessimine                                | Holarrhena antidysenterica | -6.4 |
| 189 | T78  | 5281650   | Mangostin                                     | Garcinia mangostana        | -6.4 |
| 190 | T95  | 10208     | Chrysophanol                                  | Rheum rhabarbarum          | -6.4 |
| 191 | W1   | 442027    | Ferruginol                                    | Chamaecyparis obtusa       | -6.4 |
| 192 | T155 | 969516    | Curcumin                                      | Curcuma longa              | -6.4 |
| 193 | W8   | 44427461  | Diacetoxyabieta                               | Juniperus formosana        | -6.4 |
| 194 | K21  | 135501639 | N2,N2-Dimethylguanosine                       | Cordyceps                  | -6.3 |
| 195 | T165 | 5281708   | Daidzein                                      | Pueraria thomsoni          | -6.3 |
| 196 | T195 | 5317436   | Alloisoimperatorin                            | Angelica dahurica          | -6.3 |
| 197 | T236 | 91520     | Catalpol                                      | Rehmannia glutinosa        | -6.3 |
| 198 | T237 | 124375    | Glucogallin                                   | Rheum rhabarbarum          | -6.3 |
| 199 | T258 | 245005    | Aconitine                                     | Aconitum napellus          | -6.3 |
| 200 | T63  | 101729    | Cyclolaudenol                                 | Marsilea quadrifolia       | -6.3 |
| 201 | T73  | 2543      | Cannabinol                                    | Cannabis sativa            | -6.3 |
| 202 | T97  | 23035     | Leucoindigo                                   | Indigo pulverata levis     | -6.3 |
| 203 | W2   | 11289118  | Dehydroabieta-7-one                           | Chamaecyparis obtusa       | -6.3 |
| 204 | K3   | 127187    | N6-Hydroxymethyladenosine                     | Cordyceps                  | -6.2 |
| 205 | K8   | 2055      | N-Phenyl-alpha-cyano-3,4-dihydroxycinnamamide | Cordyceps                  | -6.2 |
| 206 | T156 | 6688      | 1,4-Dihydroxyanthraquinone                    | Rubia cordifolia           | -6.2 |
| 207 | T157 | 63224     | Febrifugine                                   | Dichroa febrifuga          | -6.2 |
| 208 | T177 | 10212     | Imperatorin                                   | Angelica dahurica          | -6.2 |
| 209 | T54  | 5281607   | Chrysin                                       | Oroxylum indicum           | -6.2 |
| 210 | T74  | 10166     | Eleutherin                                    | Eleutherine subaphylla     | -6.2 |
| 211 | W5   | 44427460  | 8-Hydroxyabieta-9(11),13-diene-12-one         | Chamaecyparis obtusa       | -6.2 |
| 212 | K16  | 65095     | 1-Methylinosine                               | Cordyceps                  | -6.1 |

|     |      |           |                                           |                         |      |
|-----|------|-----------|-------------------------------------------|-------------------------|------|
| 213 | K4   | 96373     | 1-Methylguanosine                         | Cordyceps               | -6.1 |
| 214 | T127 | 5281376   | Lathyrrol                                 | Euphorbia lathyris      | -6.1 |
| 215 | T168 | 9851693   | Isofebrifugine                            | Dichroa febrifuga       | -6.1 |
| 216 | T178 | 33306     | Oxypeucedanin                             | Angelica dahurica       | -6.1 |
| 217 | T208 | 5281811   | Tectorigenin                              | Belamcanda chinensis    | -6.1 |
| 218 | T226 | 5321124   | Sappanin                                  | Caesalpinia sappan      | -6.1 |
| 219 | T231 | 174174    | Atropine                                  | Datura metel            | -6.1 |
| 220 | T251 | 182140    | Hypophyllanthin                           | Phyllanthus urinaria    | -6.1 |
| 221 | T257 | 182644    | Nirtetralin                               | Phyllanthus urinaria    | -6.1 |
| 222 | T265 | 220401    | Colchamine                                | Colchicum autumnale     | -6.1 |
| 223 | T59  | 10569     | Abietic acid                              | Resina Pini-Colophonium | -6.1 |
| 224 | T67  | 5281616   | Galangin                                  | Alpinia officinarum     | -6.1 |
| 225 | W6   | 14827260  | 7beta-hydroxydeoxycriptojaponol           | Cryptomeria japonica    | -6.1 |
| 226 | K1   | 441300    | Abacavir                                  | Cordyceps               | -6   |
| 227 | K28  | 135398508 | Entecavir                                 | Cordyceps               | -6   |
| 228 | K35  | 13342874  | (S)-5'-Deoxy-5'-(methylsulfinyl)adenosine | Cordyceps               | -6   |
| 229 | T132 | 26305     | Nodakenetin                               | Peucedanum decursivum   | -6   |
| 230 | T148 | 63123     | Arborine                                  | Glycosmis pentaphylla   | -6   |
| 231 | T163 | 638024    | Piperine                                  | Piper nigrum            | -6   |
| 232 | T197 | 5184      | Scopolamine                               | Datura metel            | -6   |
| 233 | T222 | 92769     | Indican                                   | Polygonum perfoliatum   | -6   |
| 234 | T240 | 6321388   | Lasiocarpine                              | Heliotropium indicum    | -6   |
| 235 | T270 | 5281441   | Enhydrin                                  | Enydra fluctuans        | -6   |
| 236 | T76  | 101616    | Lobeline                                  | Lobelia pyramidalis     | -6   |
| 237 | W4   | 11724205  | Cryptojaponol                             | Cryptomeria japonica    | -6   |
| 238 | K17  | 439946    | 2-Methylaminoadenosine                    | Cordyceps               | -5.9 |
| 239 | K23  | 107461    | N4-Acetylcytidine                         | Cordyceps               | -5.9 |
| 240 | K24  | 102175    | N6-Methyladenosine                        | Cordyceps               | -5.9 |
| 241 | K30  | 440569    | Imidazoleacetic acid riboside             | Cordyceps               | -5.9 |
| 242 | K31  | 440004    | N6,N6-Dimethyladenosine                   | Cordyceps               | -5.9 |
| 243 | K5   | 65102     | 3'-Amino-3'-deoxyadenosine                | Cordyceps               | -5.9 |
| 244 | K6   | 10492375  | 5-Carboxy-2'-deoxyuridine                 | Cordyceps               | -5.9 |
| 245 | T134 | 73174     | Dehydrocostus lactone                     | Radix saussureae lappae | -5.9 |
| 246 | T145 | 23242585  | Odorine                                   | Allium odorum           | -5.9 |
| 247 | T153 | 5318874   | Angenomalin                               | Angelica dahurica       | -5.9 |
| 248 | T183 | 5281555   | Pyrethrin II                              | Chrysanthemum           | -5.9 |
| 249 | T190 | 68081     | Isoimperatorin                            | Angelica dahurica       | -5.9 |
| 250 | T191 | 285698    | Matrine                                   | Sophora flavescens      | -5.9 |
| 251 | T256 | 161464    | Leonurine                                 | Leonurus sibiricus      | -5.9 |
| 252 | T98  | 135426527 | Glycosminine                              | Glycosmis pentaphylla   | -5.9 |
| 253 | K11  | 92751     | Orotidine                                 | Cordyceps               | -5.8 |
| 254 | K18  | 135601234 | 5'-Methylthioinosine                      | Cordyceps               | -5.8 |
| 255 | K26  | 443234    | 5'-Dehydroadenosine                       | Cordyceps               | -5.8 |

|     |      |           |                          |                           |      |
|-----|------|-----------|--------------------------|---------------------------|------|
| 256 | K27  | 439176    | 5'-Methylthioadenosine   | Cordyceps                 | -5.8 |
| 257 | K36  | 46173772  | Deoxynucleotide          | Cordyceps                 | -5.8 |
| 258 | K40  | 135398641 | Inosine                  | Cordyceps                 | -5.8 |
| 259 | T104 | 6433154   | Pyrethrin I              | Chrysanthemum             | -5.8 |
| 260 | T204 | 637858    | Piperlongumine           | Piper longum              | -5.8 |
| 261 | T230 | 10227     | Kokusaginine             | Glycosmis pentaphylla     | -5.8 |
| 262 | T255 | 4990      | Anginin                  | Vigna cylindrica          | -5.8 |
| 263 | K10  | 135398593 | 2'-Deoxyinosine          | Cordyceps                 | -5.7 |
| 264 | K14  | 72200     | 2-Aminoadenosine         | Cordyceps                 | -5.7 |
| 265 | K25  | 60961     | Adenosine                | Cordyceps                 | -5.7 |
| 266 | K32  | 159269    | Telbivudine              | Cordyceps                 | -5.7 |
| 267 | K34  | 46173721  | Pyrimidine 5'-nucleotide | Cordyceps                 | -5.7 |
| 268 | T144 | 10362168  | Angelol G                | Angelica pubescens        | -5.7 |
| 269 | T210 | 6436243   | Costus lactone           | Radix saussureae lappae   | -5.7 |
| 270 | T219 | 5365703   | Ambrettolid              | Hibiscus abelmoschus      | -5.7 |
| 271 | T227 | 12314211  | Phyllantidine            | Phyllanthus urinaria      | -5.7 |
| 272 | T238 | 571784    | Phyllanthine             | Phyllanthus urinaria      | -5.7 |
| 273 | T259 | 440936    | Arbutin                  | Gaultheria fragrantissima | -5.7 |
| 274 | W15  | 72303     | Honokiol                 | Magnolia officinalis      | -5.7 |
| 275 | K33  | 1835      | 5-Methyldeoxycytidine    | Cordyceps                 | -5.6 |
| 276 | T149 | 120697    | Eleutherol               | Eleutherine subaphylla    | -5.6 |
| 277 | T199 | 10834     | Tropacocaine             | Erythroxylum coca         | -5.6 |
| 278 | T205 | 1548943   | Capsaicin                | Capsicum annum            | -5.6 |
| 279 | T233 | 5370536   | Piperic acid             | Piper nigrum              | -5.6 |
| 280 | T234 | 2355      | Bergapten                | Angelica sinensis         | -5.6 |
| 281 | K20  | 104762    | Mizoribine               | Cordyceps                 | -5.5 |
| 282 | T242 | 6303      | Cordycepin               | Cordyceps                 | -5.5 |
| 283 | T159 | 72300     | Magnolol                 | Magnolia officinalis      | -5.5 |
| 284 | T215 | 10228     | Osthol                   | Cnidium monnieri          | -5.5 |
| 285 | T229 | 6760      | Skimmianine              | Ruta graveolens           | -5.5 |
| 286 | T235 | 10205     | Plumbagin                | Plumbago zeylanica        | -5.5 |
| 287 | T282 | 637775    | Sinapinic acid           | Brassica juncea           | -5.5 |
| 288 | K13  | 5789      | Thymidine                | Cordyceps                 | -5.4 |
| 289 | K19  | 13712     | Deoxyuridine             | Cordyceps                 | -5.4 |
| 290 | K22  | 6029      | Uridine                  | Cordyceps                 | -5.4 |
| 291 | K38  | 99592     | 3-Methyluridine          | Cordyceps                 | -5.4 |
| 292 | T164 | 5281226   | Bixin                    | Bixa orellana             | -5.4 |
| 293 | T213 | 5478166   | Urushiol                 | Rhus succedanea           | -5.4 |
| 294 | T241 | 1148      | DL-Tryptophan            | Vigna cylindrica          | -5.4 |
| 295 | T246 | 5280460   | Scopoletin               | Angelica dahurica         | -5.4 |
| 296 | T263 | 3806      | Juglone                  | Juglans regia             | -5.4 |
| 297 | K12  | 15047     | Pseudouridine            | Cordyceps                 | -5.3 |
| 298 | T292 | 40539     | Quisqualic acid          | Quisqualis indica         | -5.3 |



|     |      |          |                                |                                     |      |
|-----|------|----------|--------------------------------|-------------------------------------|------|
| 299 | W10  | 44427462 | Cedrane-3beta,12-diol          | Juniperus formosana                 | -5.3 |
| 300 | K29  | 6175     | Cytidine                       | Cordyceps                           | -5.2 |
| 301 | T136 | 101549   | Vetiverol                      | Vetiveria zizanioides               | -5.2 |
| 302 | T181 | 273569   | Alpha-Cyperol                  | Cyperus rotundus                    | -5.2 |
| 303 | T211 | 160570   | Cannabidiolic acid             | Cannabis sativa                     | -5.2 |
| 304 | T212 | 5281232  | Crocin                         | Gardenia jasminoides                | -5.2 |
| 305 | T262 | 2775     | Citropten                      | Citrus medica L. var. sarcodactylis | -5.2 |
| 306 | T291 | 10742    | Syringic                       | Kalanchoe pinnata                   | -5.2 |
| 307 | T295 | 5459896  | Cycasin                        | Cycas revoluta                      | -5.2 |
| 308 | K39  | 439714   | Allantoin                      | Cordyceps                           | -5.1 |
| 309 | T225 | 5316107  | Costol                         | Radix saussureae lappae             | -5.1 |
| 310 | T243 | 6755     | Lawson                         | Lawsonia inermis                    | -5.1 |
| 311 | T252 | 442106   | Hypaphorine                    | Erythrina orientalis                | -5.1 |
| 312 | T253 | 521903   | Patchouli alcohol              | Pogostemon cablin                   | -5.1 |
| 313 | T267 | 6047     | Levodopa                       | Vicia faba                          | -5.1 |
| 314 | T275 | 689043   | Caffeic acid                   | Kalanchoe pinnata                   | -5.1 |
| 315 | W11  | 10398656 | Alpha-Cadinol                  | Chamaecyparis obtusa                | -5.1 |
| 316 | T232 | 5281794  | Shogaol                        | Zingiber officinale                 | -5   |
| 317 | T249 | 10235    | Cytisine                       | Sophora flavescens                  | -5   |
| 318 | T250 | 131273   | 3-Heptadecadienyl pyrocatechol | Rhus succedanea                     | -5   |
| 319 | T272 | 370      | Gallic acid                    | Terminalia chebula                  | -5   |
| 320 | T277 | 994      | Polyphenylalanine              | Vigna cylindrica                    | -5   |
| 321 | T285 | 440473   | Leucenol                       | Leucaena glauca                     | -5   |
| 322 | T289 | 3862     | Mimosine                       | Mimosa pudica                       | -5   |
| 323 | K37  | 439920   | Pyrimidine nucleoside          | Cordyceps                           | -4.9 |
| 324 | T273 | 10659    | Apiole                         | Petroselinum sativum                | -4.9 |
| 325 | T290 | 5816     | Adrenalin                      | Ephedra sinica                      | -4.9 |
| 326 | T304 | 10772    | Coixol                         | Coix lacryma-jobi                   | -4.9 |
| 327 | T330 | 525      | Malic acid                     | Tomato                              | -4.9 |
| 328 | T189 | 10657    | Beta-Cadinene                  | Pogostemon cablin                   | -4.8 |
| 329 | T254 | 5352899  | Butylidenephthalide            | Angelica sinensis                   | -4.8 |
| 330 | T260 | 5281426  | Umbelliferone                  | Angelica dahurica                   | -4.8 |
| 331 | T266 | 4276     | Myristicin                     | Myristica fragrans                  | -4.8 |
| 332 | T274 | 31211    | Zingerone                      | Zingiber officinale                 | -4.8 |
| 333 | T281 | 636822   | Alpha-Asarone                  | Acorus gramineus                    | -4.8 |
| 334 | T288 | 3314     | Eugenol                        | Camellia sasanqua                   | -4.8 |
| 335 | T298 | 439260   | Norepinephrine                 | Banana                              | -4.8 |
| 336 | T245 | 445070   | Farnesol                       | Acacia farnesiana                   | -4.7 |
| 337 | T268 | 27694    | N-Methylheliamine              | Nelumbo nucifera                    | -4.7 |
| 338 | T283 | 5144     | Safrole                        | Angelica sinensis                   | -4.7 |
| 339 | T286 | 596375   | Chavibetol                     | Piper betle                         | -4.7 |
| 340 | T309 | 681      | Dopamine                       | Banana                              | -4.7 |
| 341 | T313 | 6274     | Histidine                      | Vigna cylindrica                    | -4.7 |

|     |      |         |                           |                                          |      |
|-----|------|---------|---------------------------|------------------------------------------|------|
| 342 | T261 | 5315981 | Cnidium lactone           | Ligusticum wallichii                     | -4.6 |
| 343 | T296 | 942     | Nicotine                  | Niconitana tabacum                       | -4.6 |
| 344 | T302 | 9294    | Ephedrine                 | Sida rhombifolia                         | -4.6 |
| 345 | T305 | 11092   | Paeonol                   | Paeonia suffruticosa                     | -4.6 |
| 346 | T306 | 66654   | Xanthoxylone              | Sapium sebiferum                         | -4.6 |
| 347 | T310 | 8815    | Estragole                 | Zanthoxylum nitidum                      | -4.6 |
| 348 | T276 | 5314067 | Nothosmyrnon              | Rhizoma et Radix Ligustici<br>jeholensis | -4.5 |
| 349 | T279 | 10364   | Carvacrol                 | Coleus aromaticus                        | -4.5 |
| 350 | T280 | 441070  | Cuscohygrine              | Erythroxylum coca                        | -4.5 |
| 351 | T300 | 4133    | Methyl salicylate         | Acacia farnesiana                        | -4.5 |
| 352 | T308 | 524874  | 3,5-Dimethoxyallylbenzene | Rhizoma et Radix Ligustici<br>jeholensis | -4.5 |
| 353 | T311 | 91460   | Ecgonine                  | Erythroxylum coca                        | -4.5 |
| 354 | T312 | 243     | Benzoic acid              | Paeonia lactiflora                       | -4.5 |
| 355 | T316 | 26934   | Norephedrine              | Ephedra sinica                           | -4.5 |
| 356 | T325 | 3532    | Guvacine                  | Areca catechu                            | -4.5 |
| 357 | T328 | 236     | DL-Asparagine             | Taraxacum officinale                     | -4.5 |
| 358 | T244 | 10545   | Ascaridole                | Chenopodium ambrosioides                 | -4.4 |
| 359 | T269 | 110680  | Hydnocarpic acid          | Hydnocarpus anthelmintica                | -4.4 |
| 360 | T271 | 5315165 | Ligusticumic acid         | Angelica sinensis                        | -4.4 |
| 361 | T299 | 412     | Nornicotine               | Niconitana tabacum                       | -4.4 |
| 362 | T303 | 10666   | Ricinine                  | Ricinus communis                         | -4.4 |
| 363 | T307 | 68148   | Chavicol                  | Piper betle                              | -4.4 |
| 364 | T329 | 275     | DL-Canavanine             | Canavalia gladiata                       | -4.4 |
| 365 | T247 | 5282855 | Gorlic acid               | Hydnocarpus anthelmintica                | -4.3 |
| 366 | T294 | 5282942 | Ricinoleic acid           | Ricinus communis                         | -4.3 |
| 367 | T314 | 938     | Nicotinic acid            | Niconitana tabacum                       | -4.3 |
| 368 | T315 | 10355   | Arecaidine                | Areca catechu                            | -4.3 |
| 369 | T318 | 68289   | Sesamol                   | Sesamum orientale                        | -4.3 |
| 370 | T278 | 7439    | Carvone                   | Mentha arvensis                          | -4.2 |
| 371 | T322 | 857     | DL-Leucine                | Sauropus androgynus                      | -4.2 |
| 372 | T331 | 1182    | DL-Valine                 | Vigna cylindrica                         | -4.2 |
| 373 | T332 | 11096   | Pseudopelletierine        | Punica granatum                          | -4.2 |
| 374 | T319 | 86786   | N-Methylisopelletierine   | Punica granatum                          | -4.1 |
| 375 | T320 | 637566  | Geraniol                  | Pelargonium roseum                       | -4.1 |
| 376 | T327 | 160492  | Guvacoline                | Areca catechu                            | -4.1 |
| 377 | T264 | 72853   | Chaulmoogric acid         | Hydnocarpus anthelmintica                | -4   |
| 378 | T284 | 14525   | Fenchone                  | Thuja orientalis                         | -4   |
| 379 | T297 | 1254    | Menthol                   | Mentha arvensis                          | -4   |
| 380 | T317 | 64685   | Borneol                   | Blumea balsamifera                       | -4   |
| 381 | T321 | 5570    | Trigonelline              | Cycas revoluta                           | -4   |
| 382 | T324 | 2230    | Arecoline                 | Areca catechu                            | -4   |
| 383 | T339 | 602     | Alanine                   | Vigna cylindrica                         | -4   |

|     |      |         |                       |                         |      |
|-----|------|---------|-----------------------|-------------------------|------|
| 384 | T287 | 5352710 | Aplotaxene            | Radix saussureae lappae | -3.9 |
| 385 | T301 | 8842    | Citronellol           | Pelargonium roseum      | -3.9 |
| 386 | T323 | 866     | DL-Lysine             | Sauropus androgynus     | -3.9 |
| 387 | T326 | 7794    | Citronellal           | Zanthoxylum avicennae   | -3.9 |
| 388 | T334 | 125468  | Tiglic acid           | Croton tiglium          | -3.9 |
| 389 | T337 | 637090  | Crotonic acid         | Croton tiglium          | -3.9 |
| 390 | T333 | 92987   | Isopelletierine       | Punica granatum         | -3.8 |
| 391 | T336 | 876     | Methionine            | Vigna cylindrica        | -3.8 |
| 392 | T293 | 160788  | Dihydrosterculic acid | Euphoria longana        | -3.7 |
| 393 | T335 | 440933  | Hygrine               | Erythroxyllum coca      | -3.6 |
| 394 | T338 | 12558   | Pyrrolizidine         | Heliotropium indicum    | -3.3 |
| 395 | T154 | 247     | Betaine               | Lycium sinense          | -3.2 |
| 396 | T147 | 65036   | Allicin               | Allium sativum          | -3.1 |
| 397 | T18  | 8082    | Piperidine            | Piper nigrum            | -3.1 |

**Table S2.** Interaction diagram of SARS-CoV-2 Mpro + ligands from docking and MD-refined structures.

| N <sup>o</sup> | Name        | Docking structure | MD-refined structure |
|----------------|-------------|-------------------|----------------------|
| 1              | <b>T82</b>  |                   |                      |
| 2              | <b>T17</b>  |                   |                      |
| 3              | <b>T56</b>  |                   |                      |
| 4              | <b>T117</b> |                   |                      |

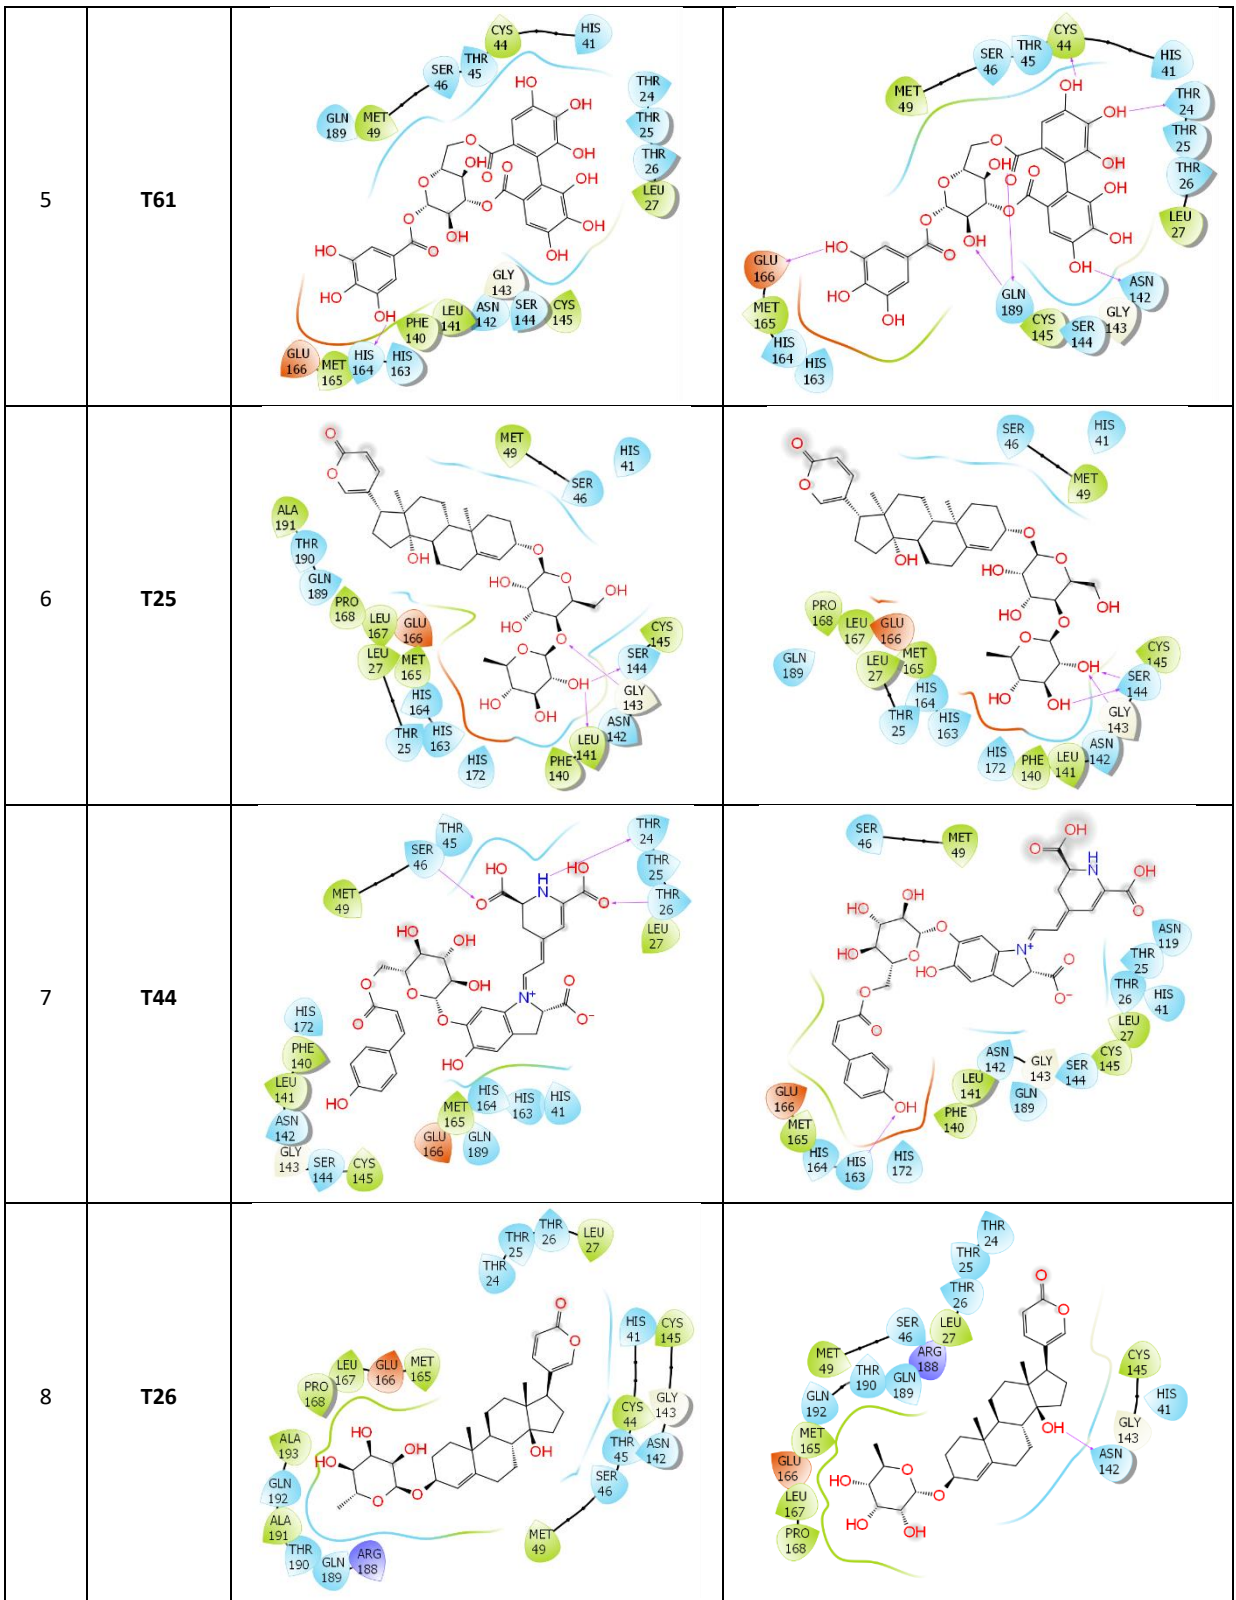

|    |     |  |  |
|----|-----|--|--|
| 9  | T33 |  |  |
| 10 | T52 |  |  |
| 11 | T24 |  |  |
| 12 | T3  |  |  |

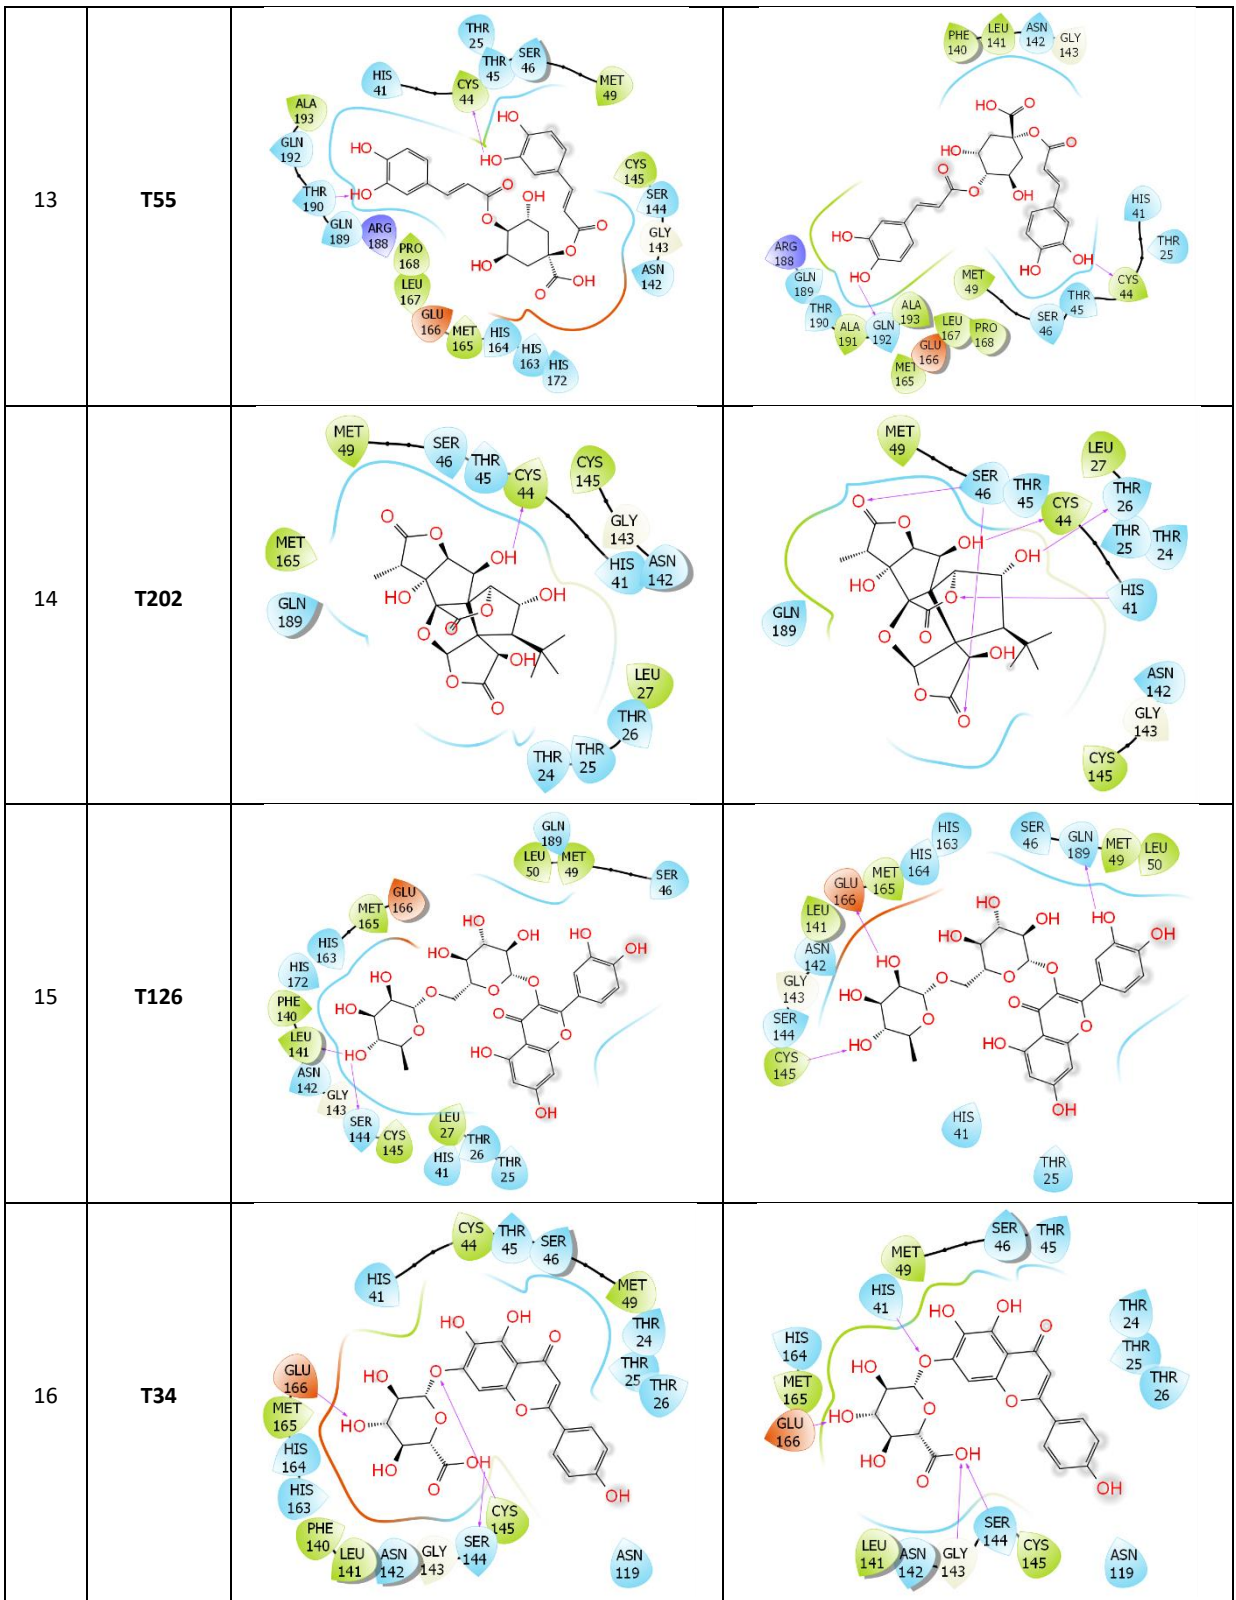

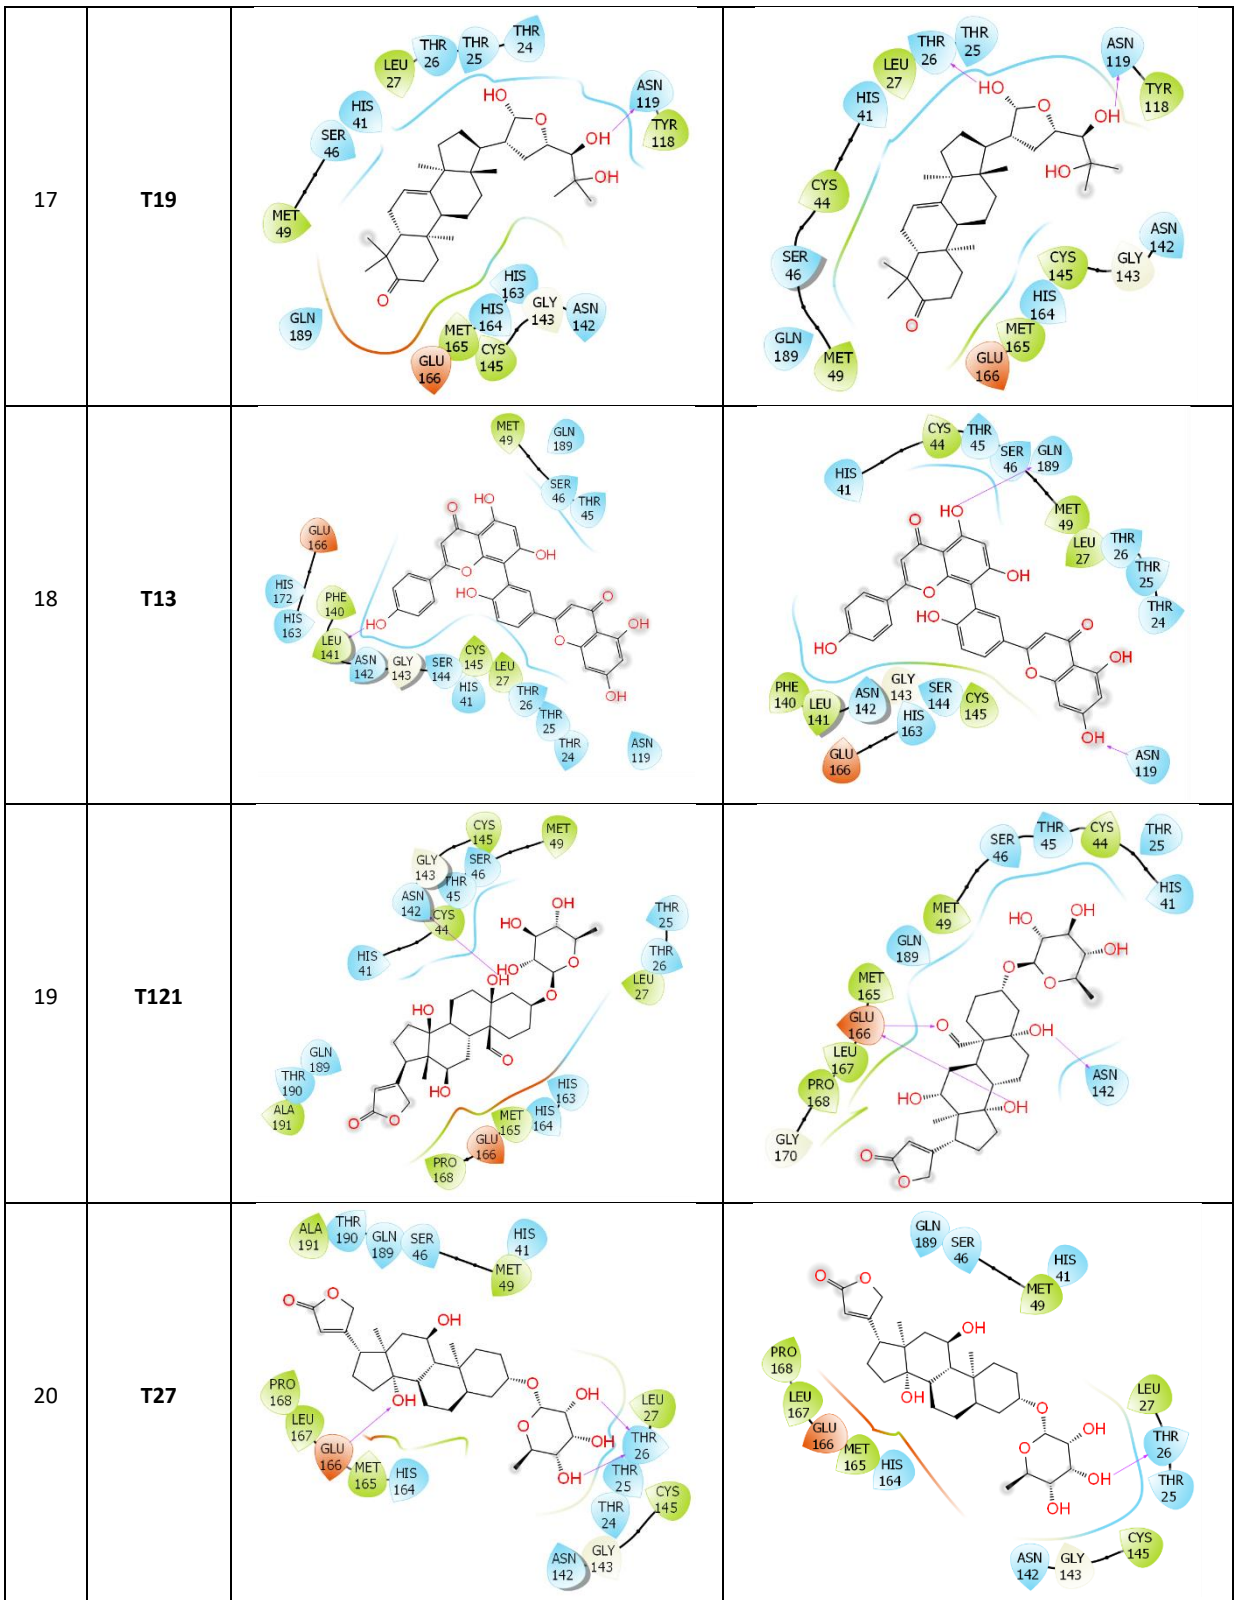



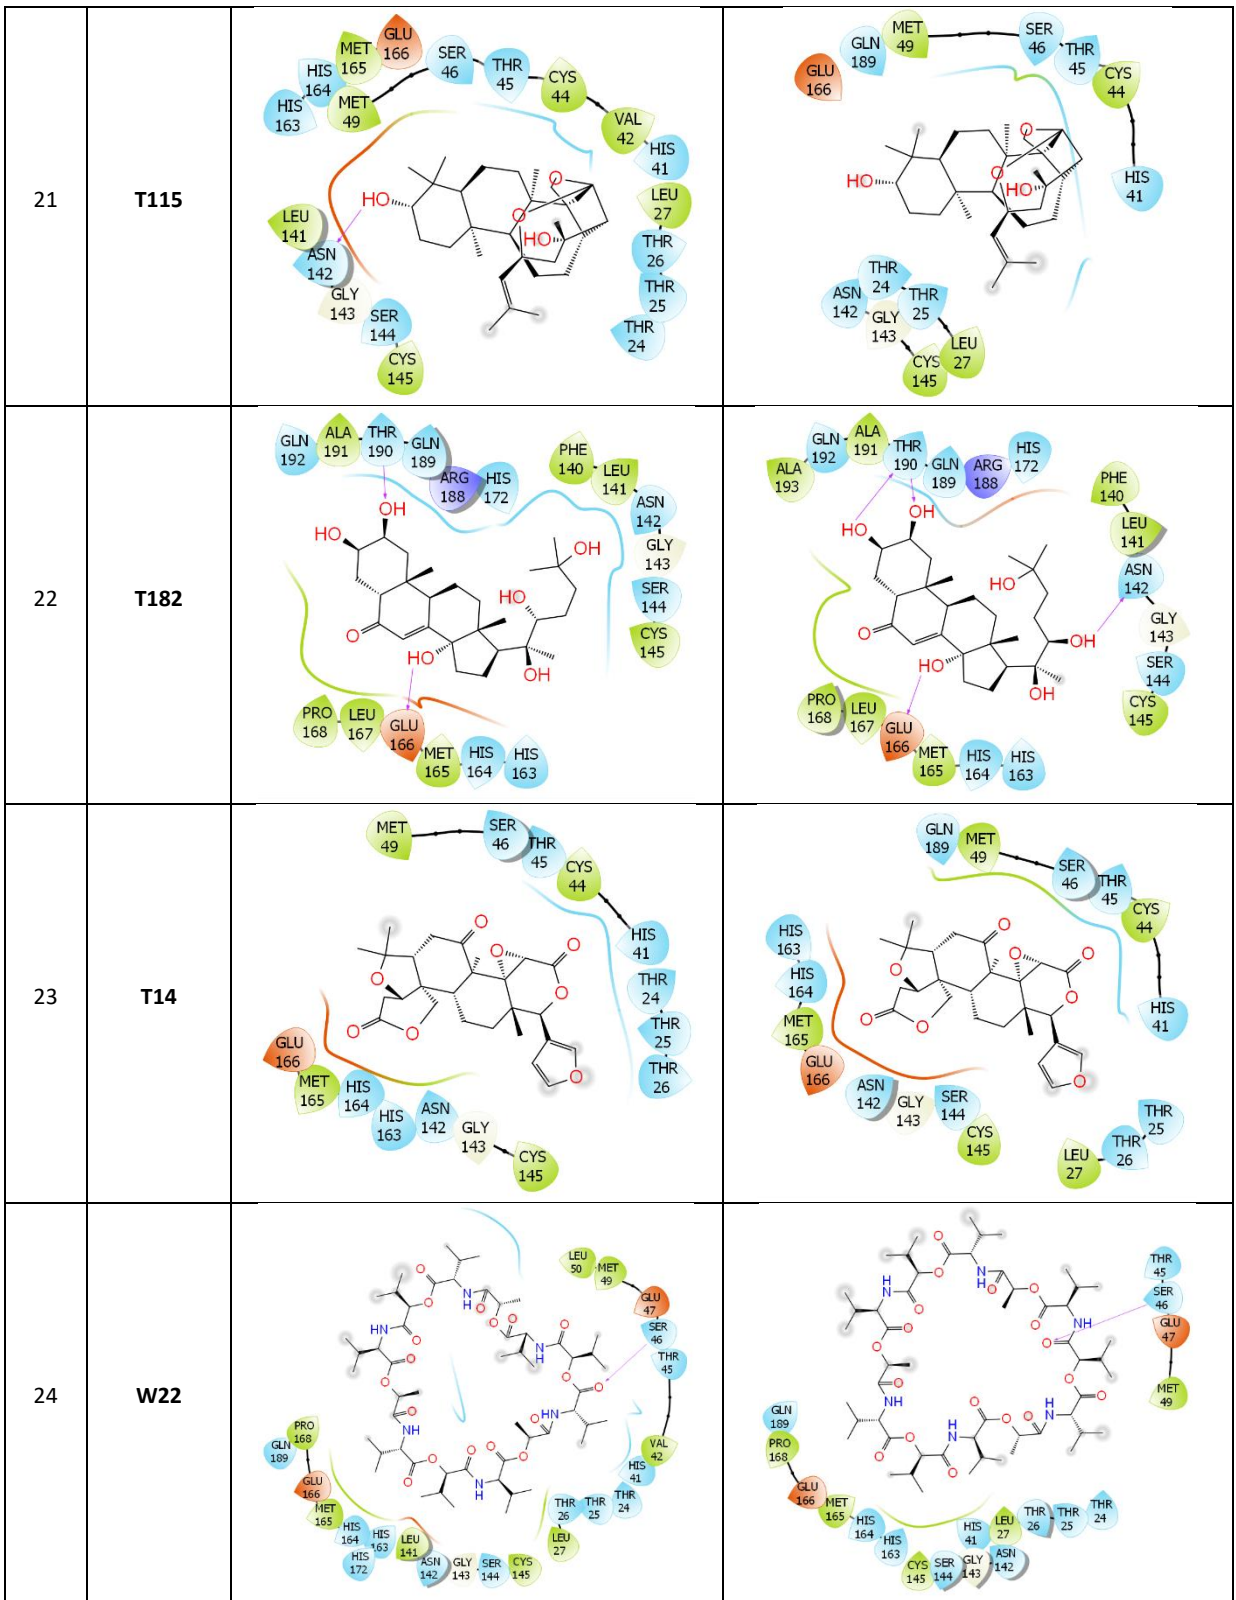

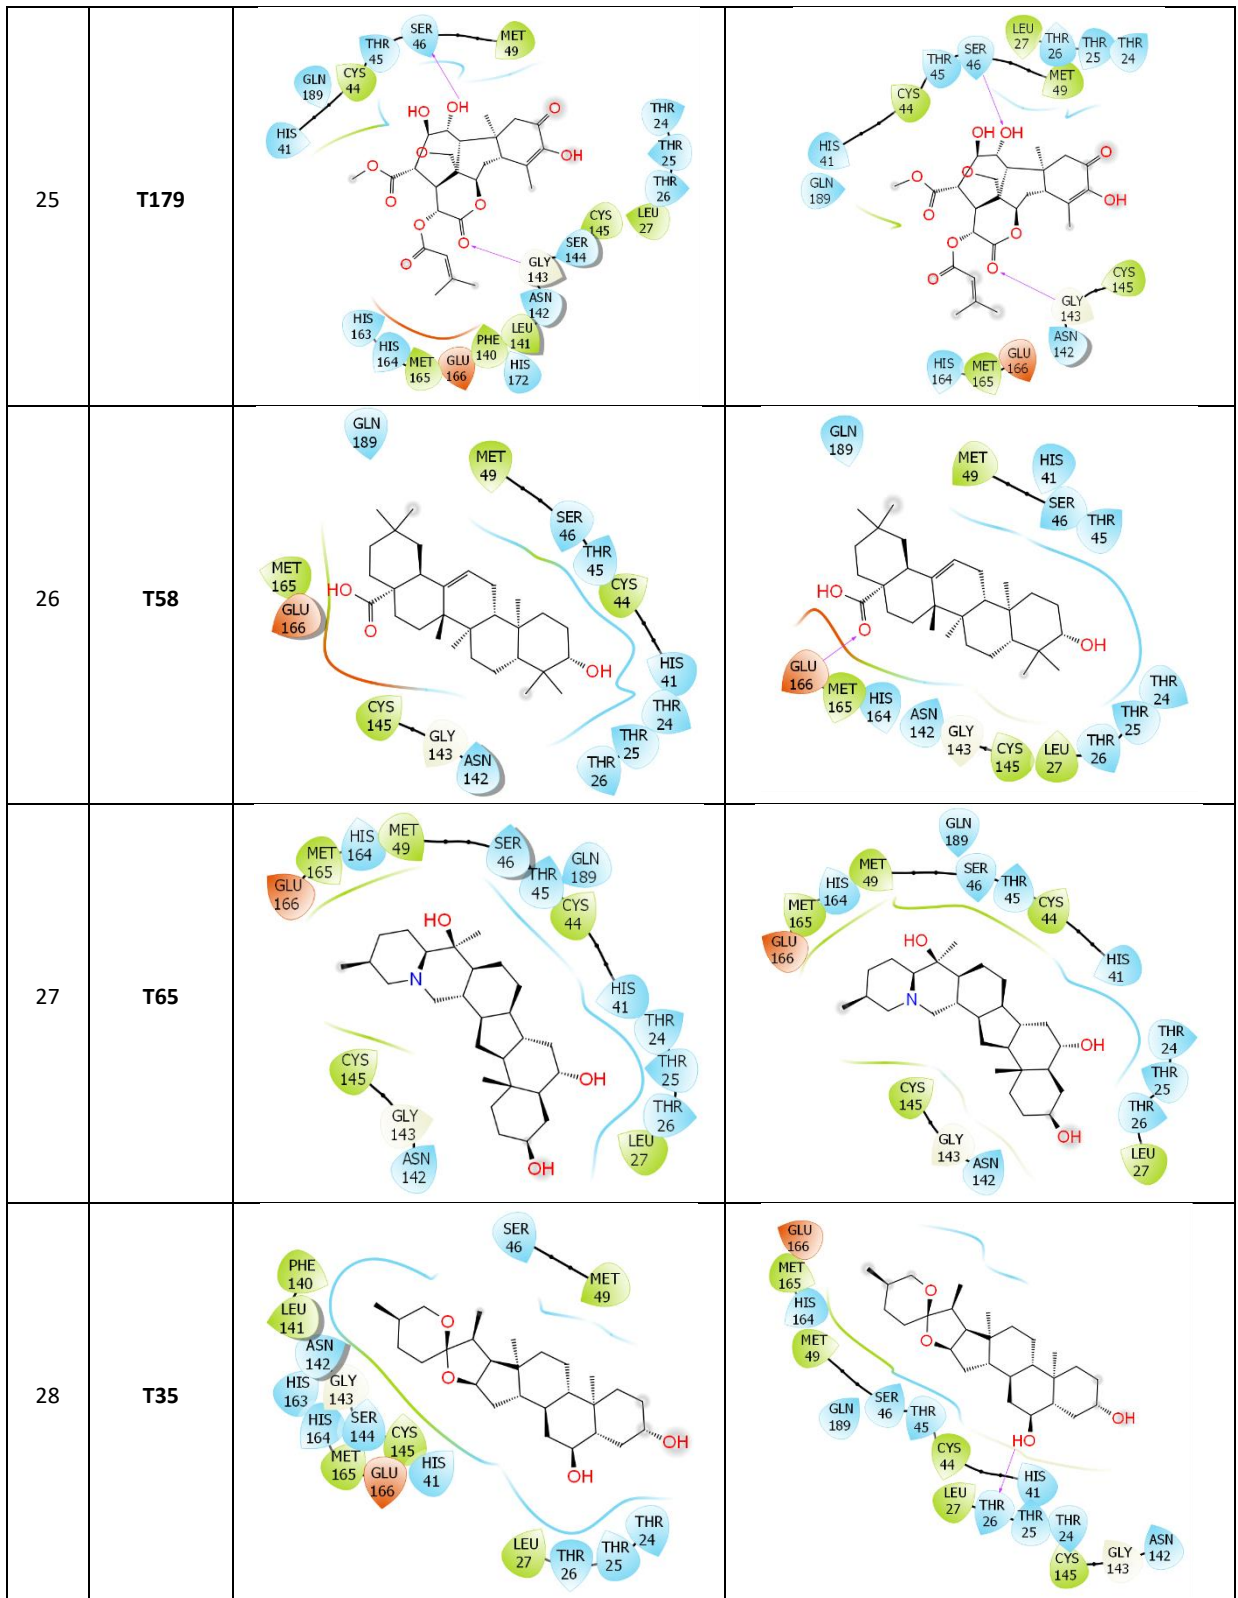

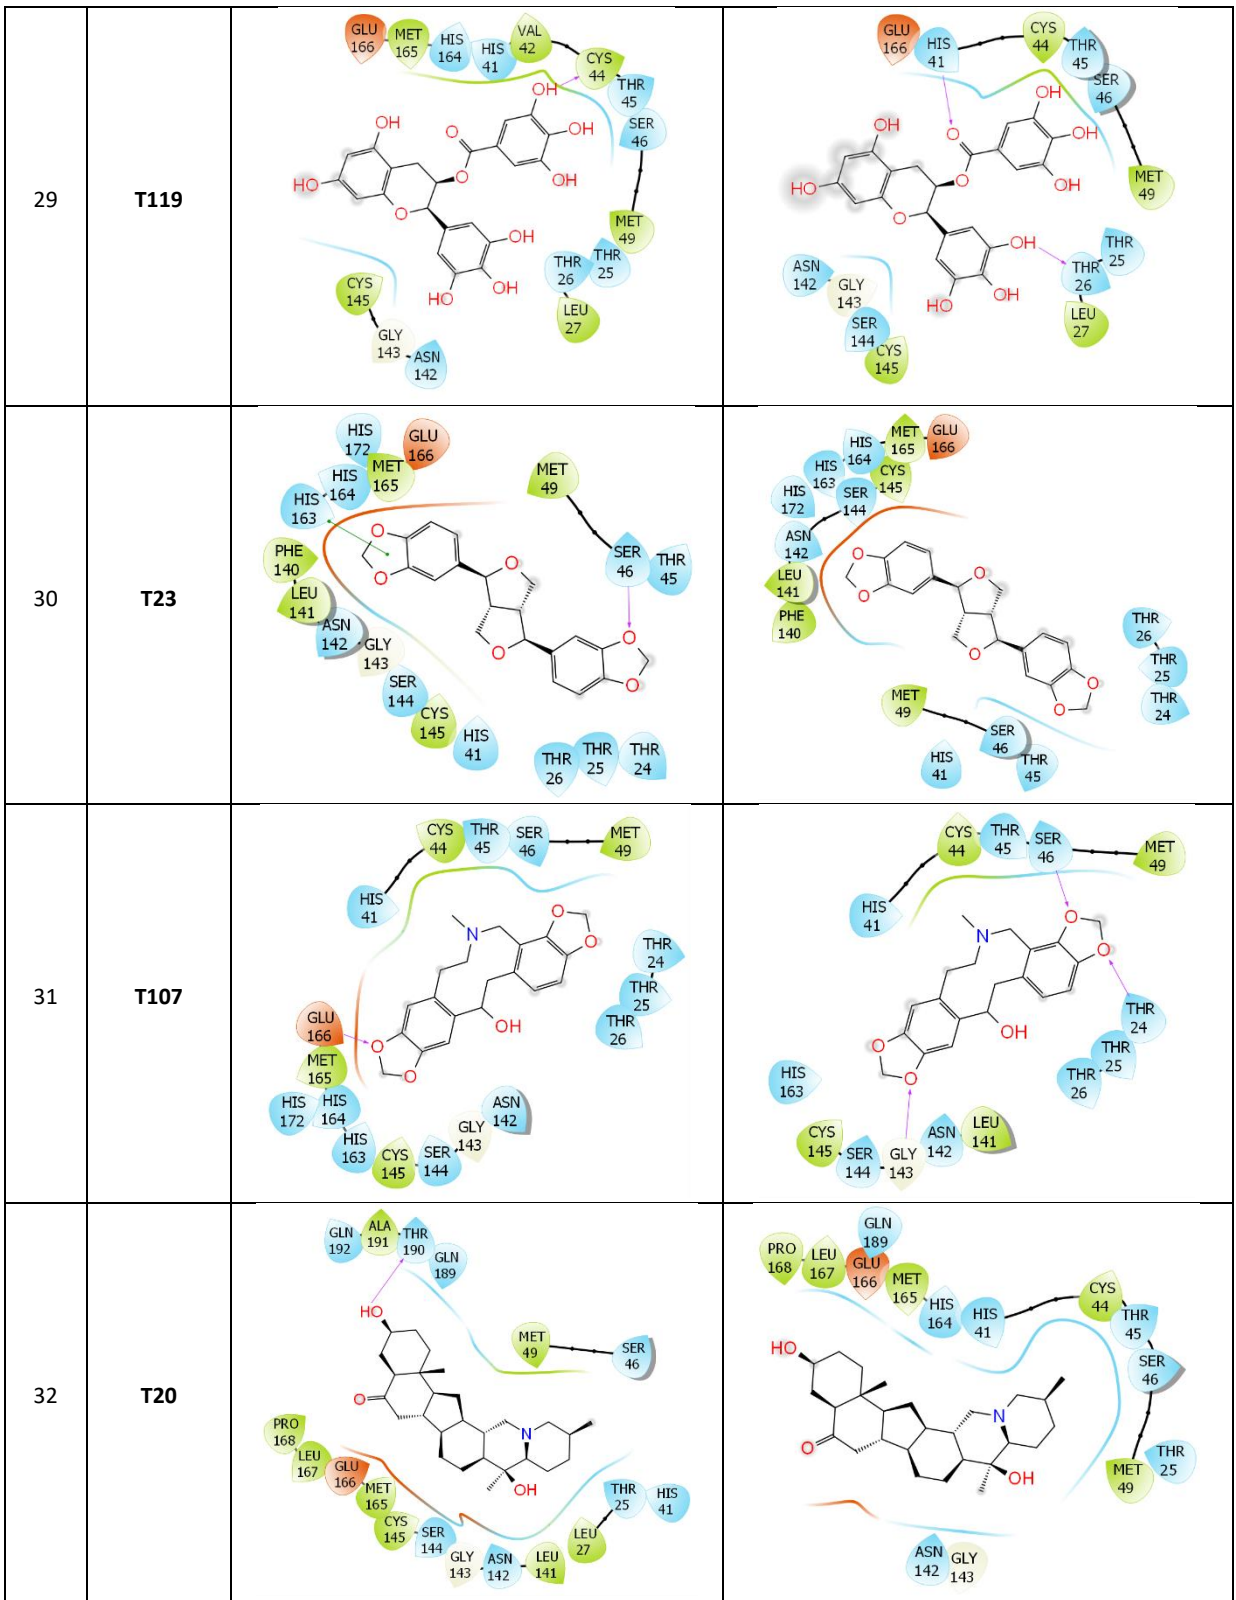

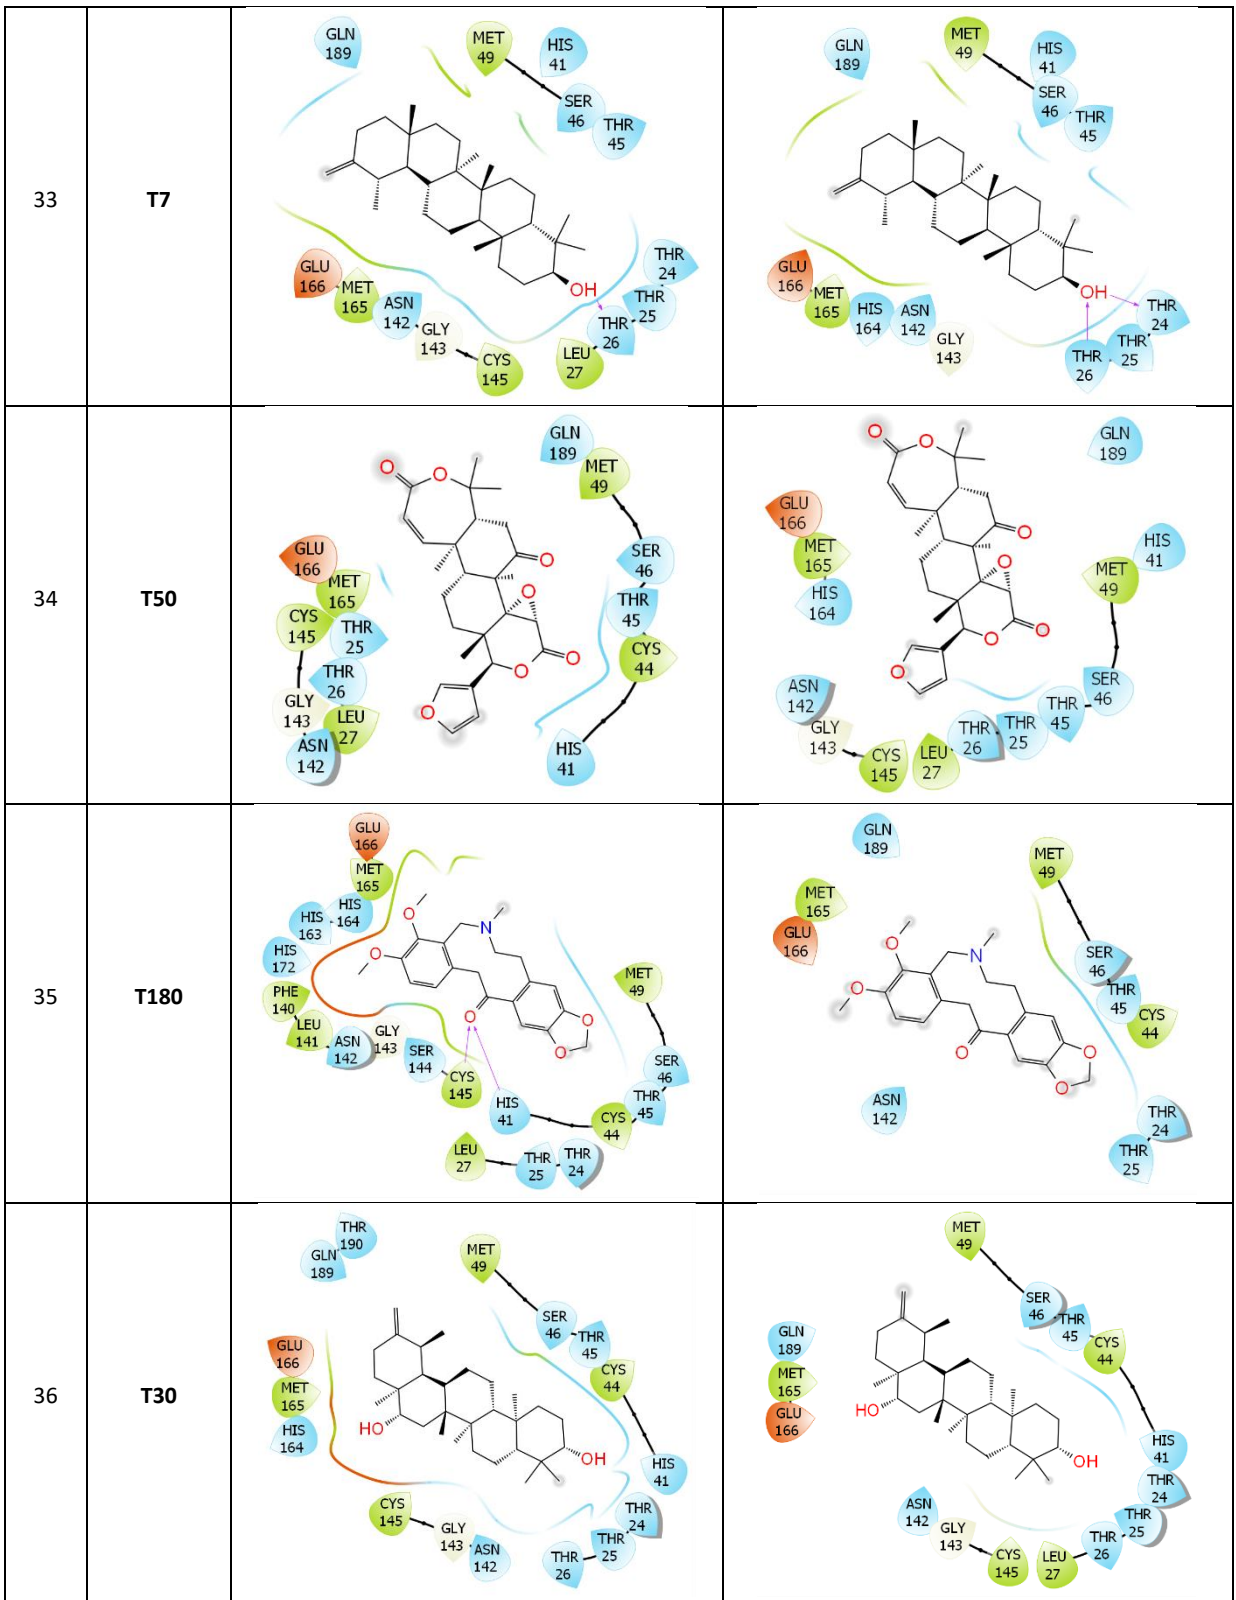

|    |      |  |  |
|----|------|--|--|
| 37 | T4   |  |  |
| 38 | T8   |  |  |
| 39 | T102 |  |  |
| 40 | T1   |  |  |

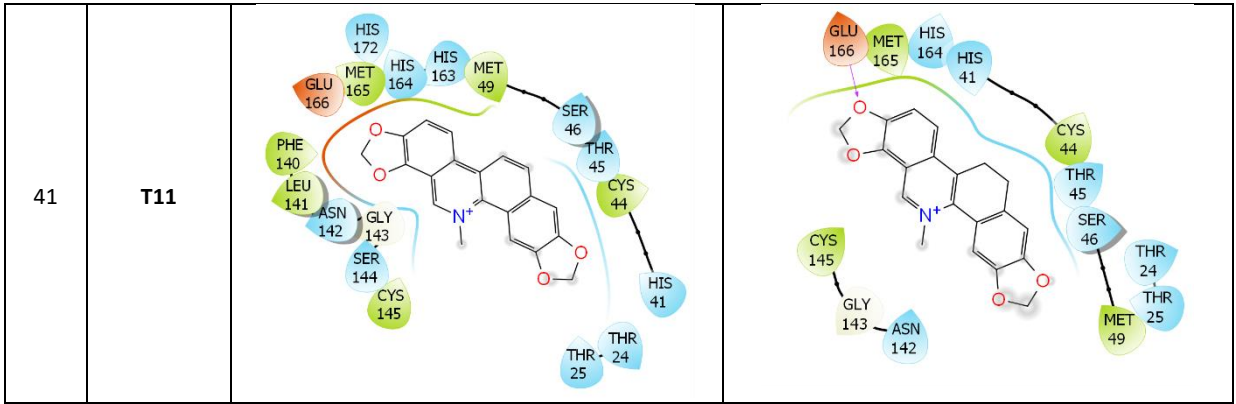

Table S3. The pulling force in displacement dependence over FPL simulations

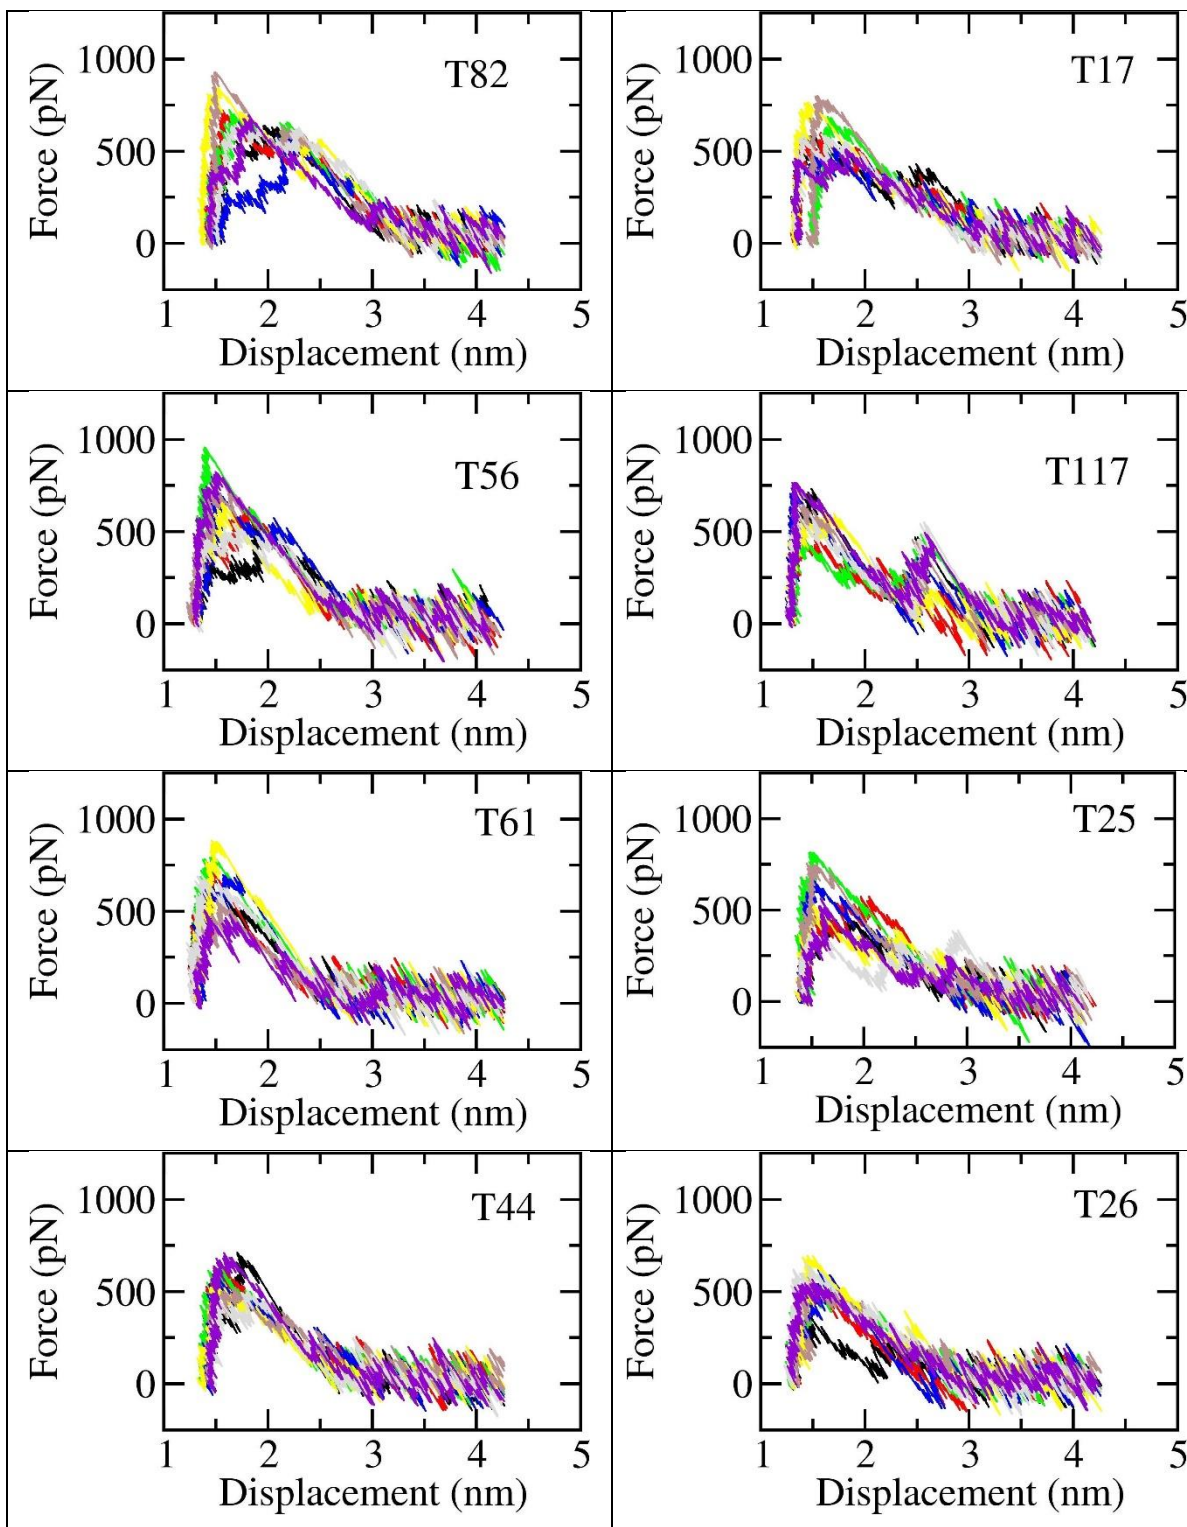

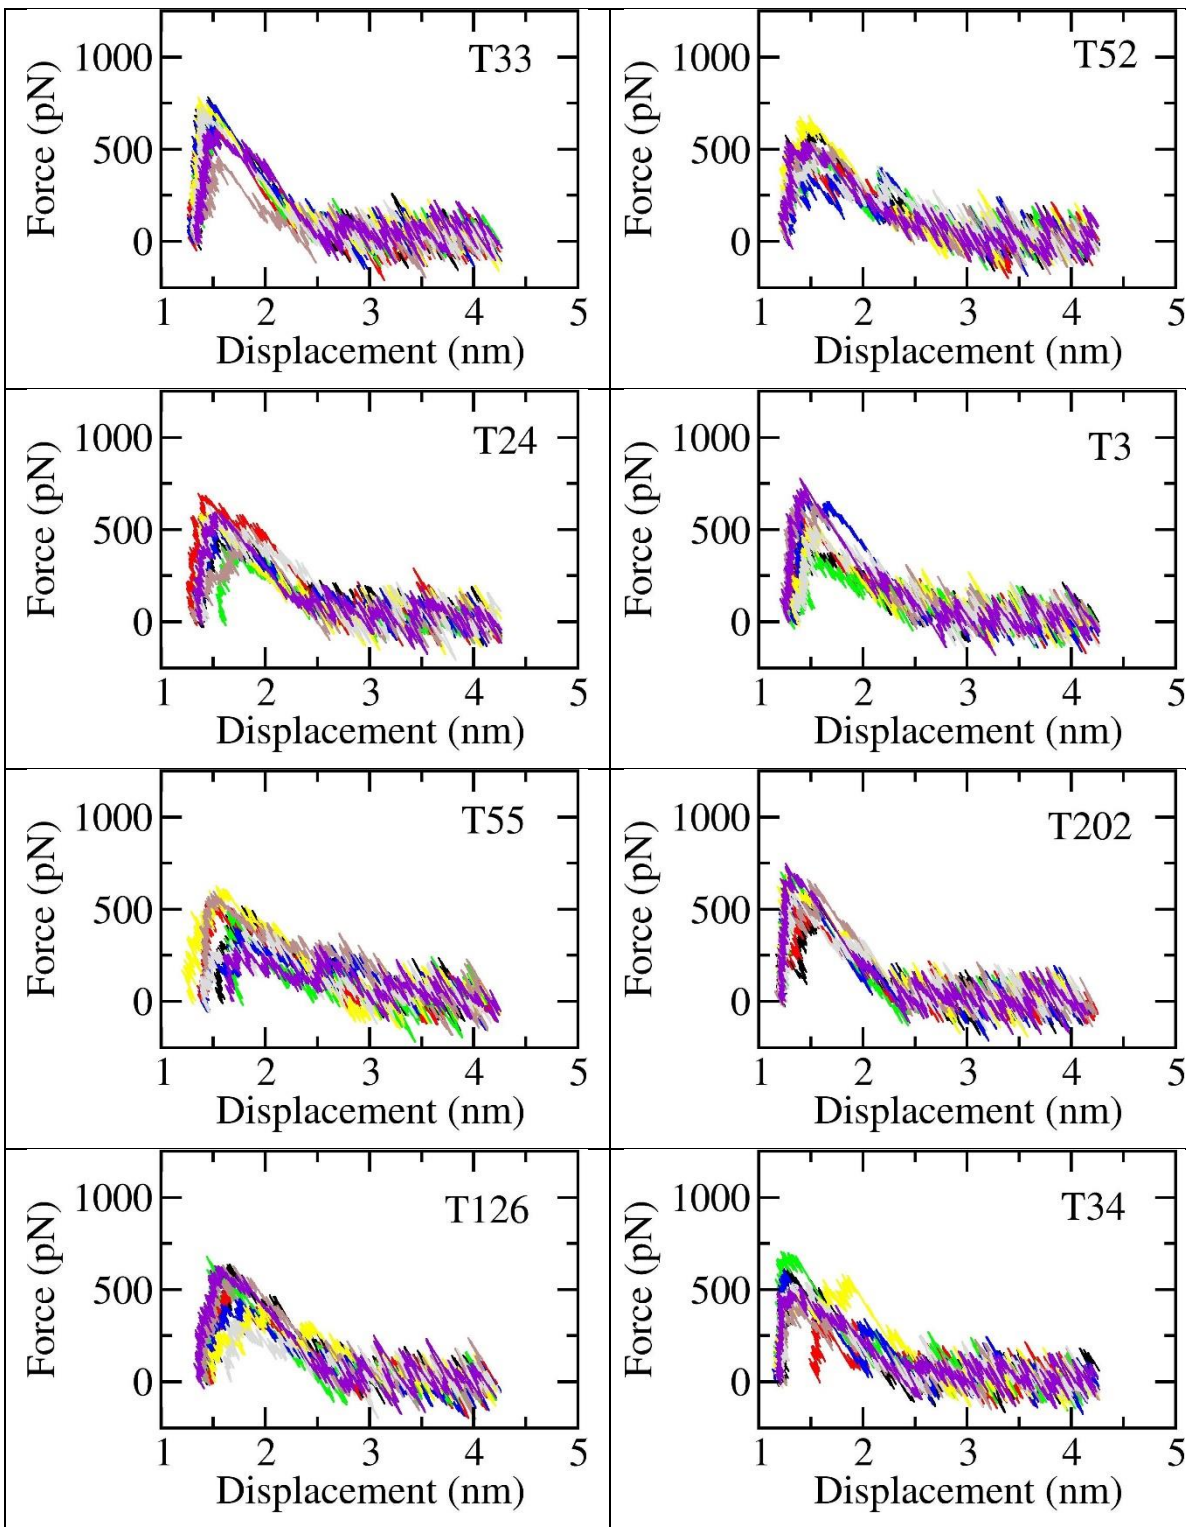



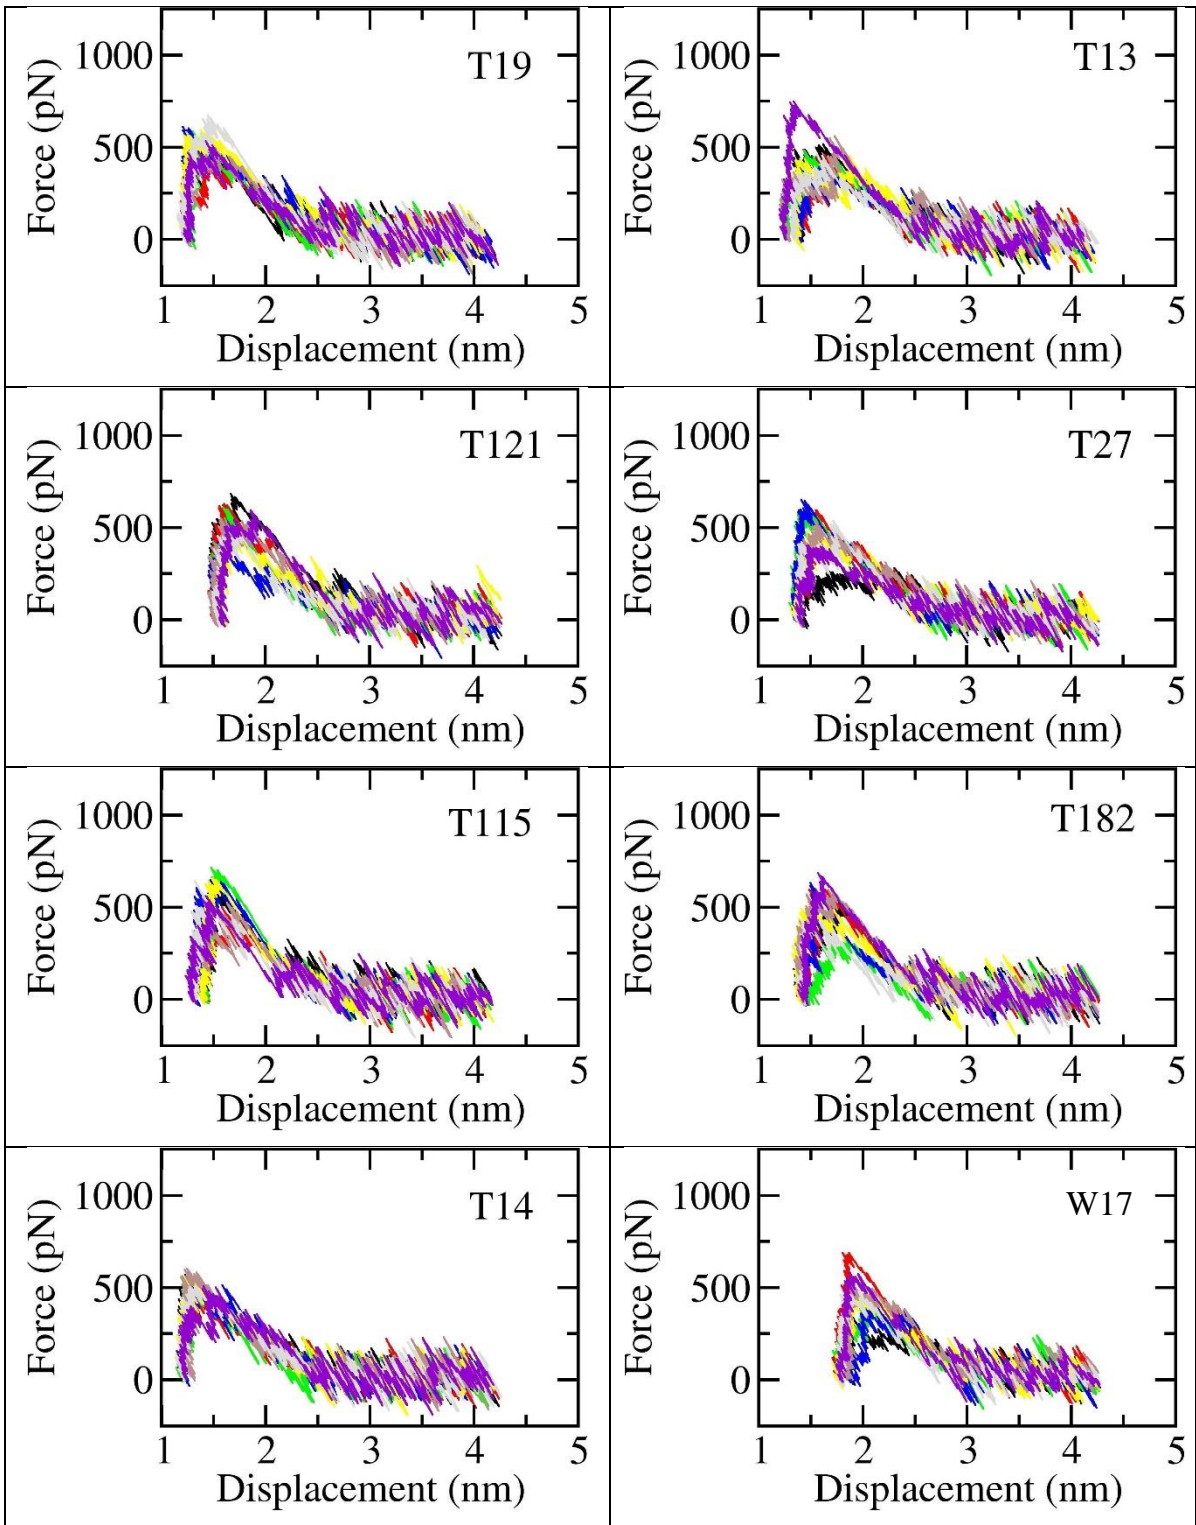

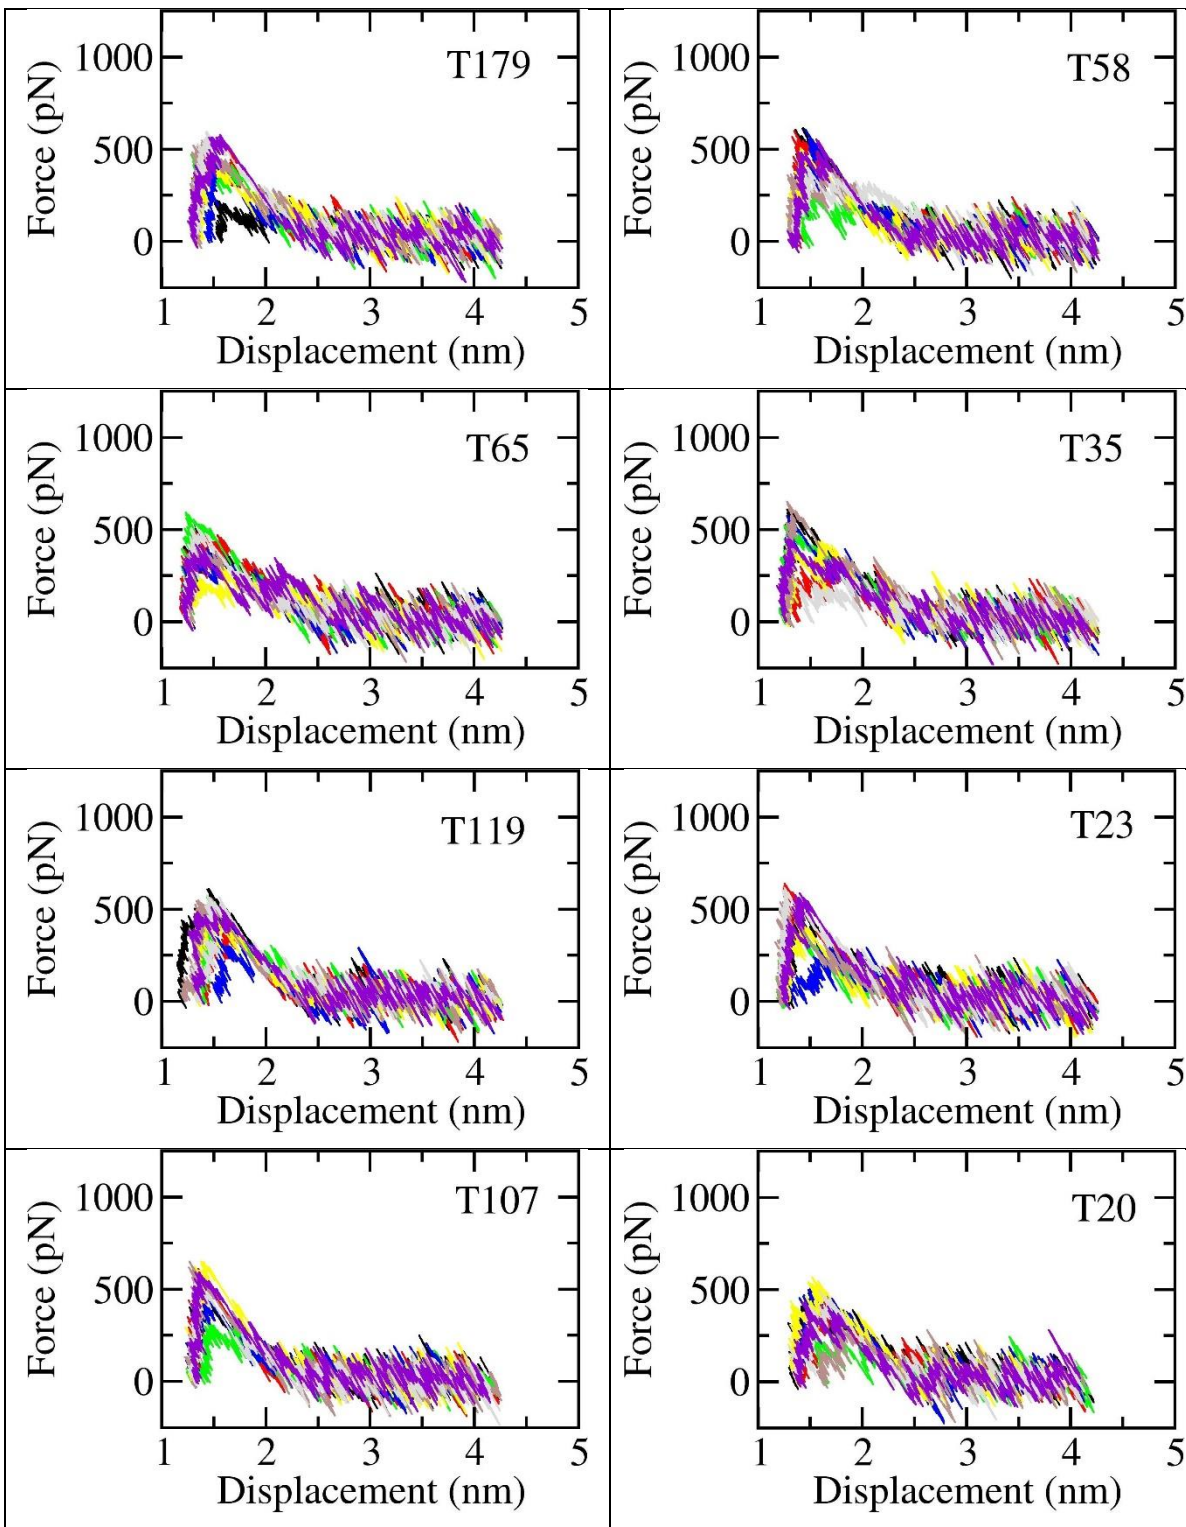

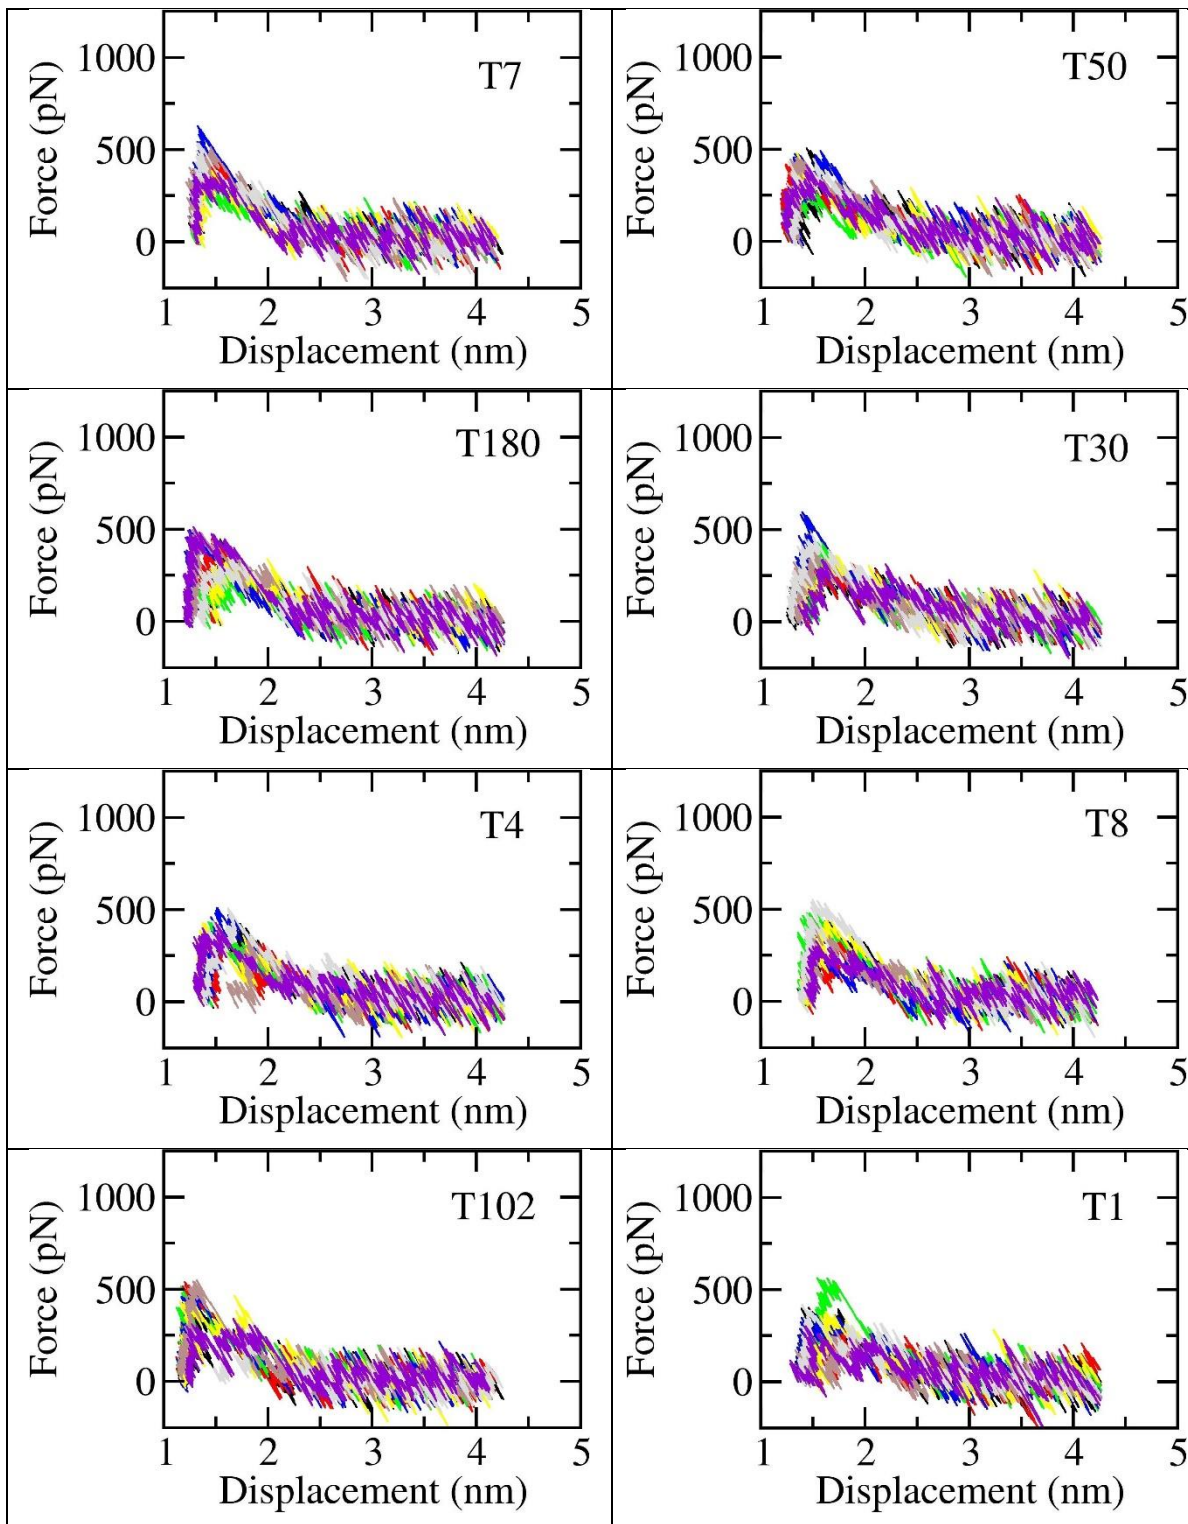

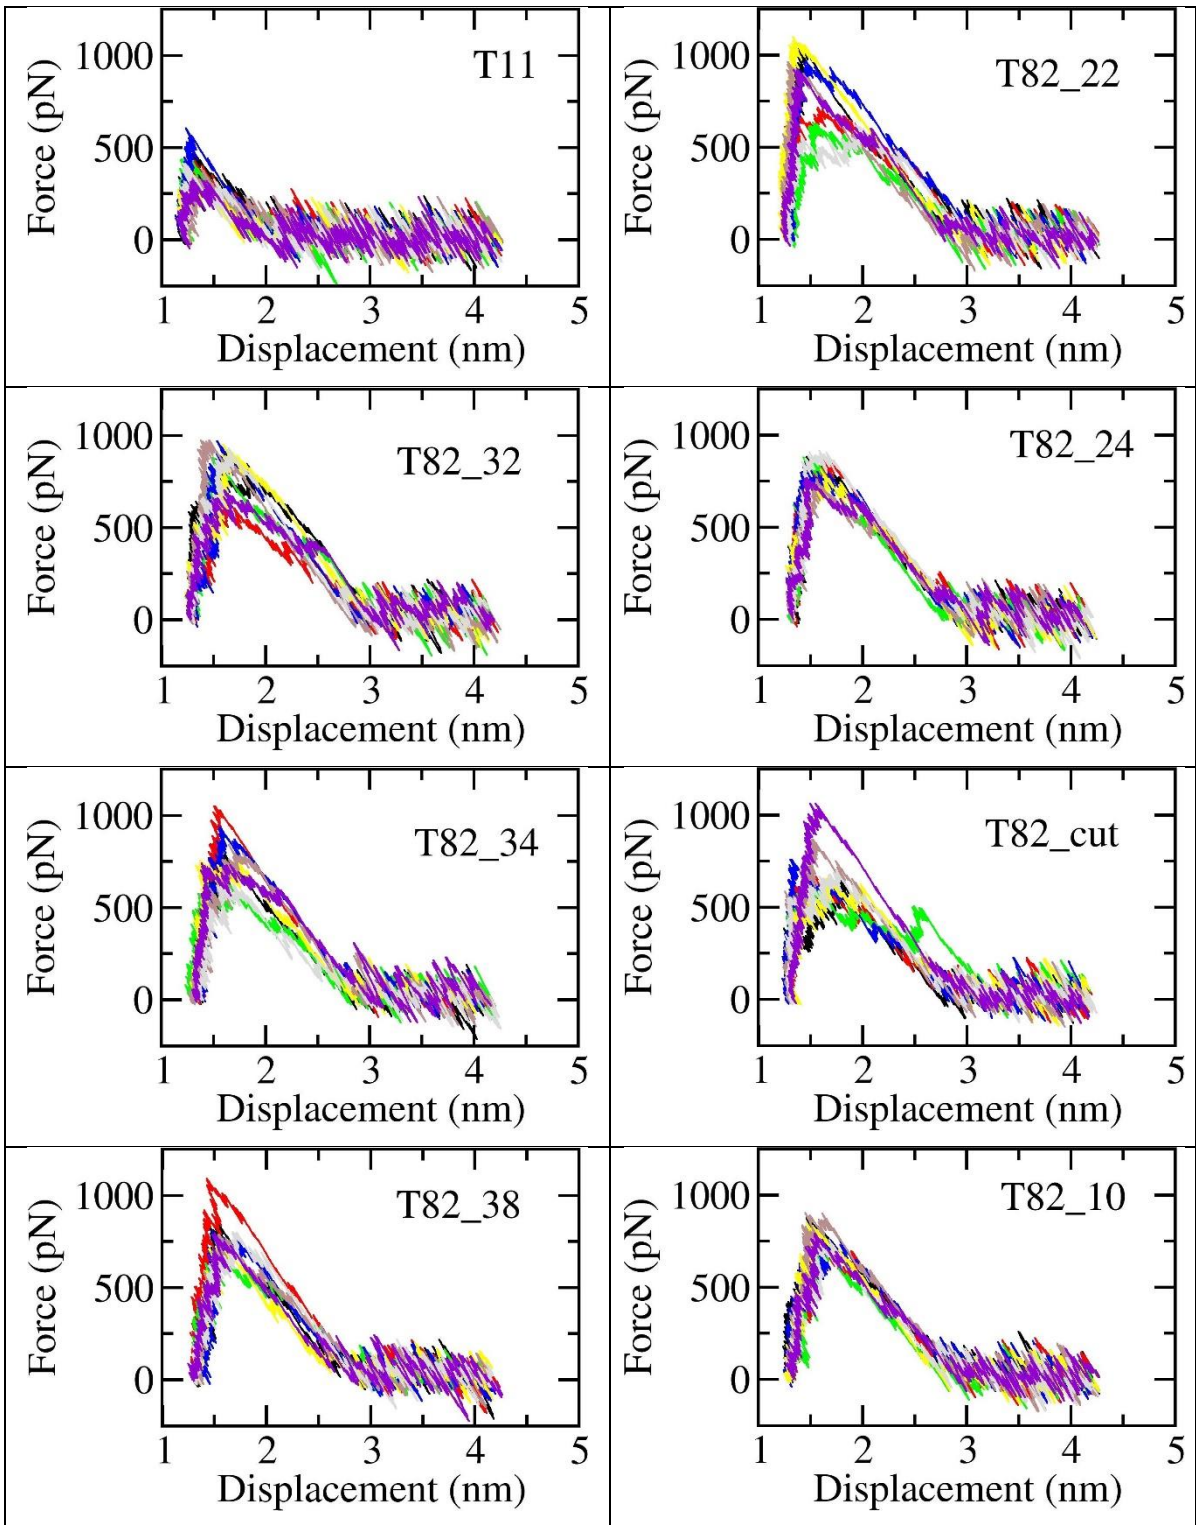

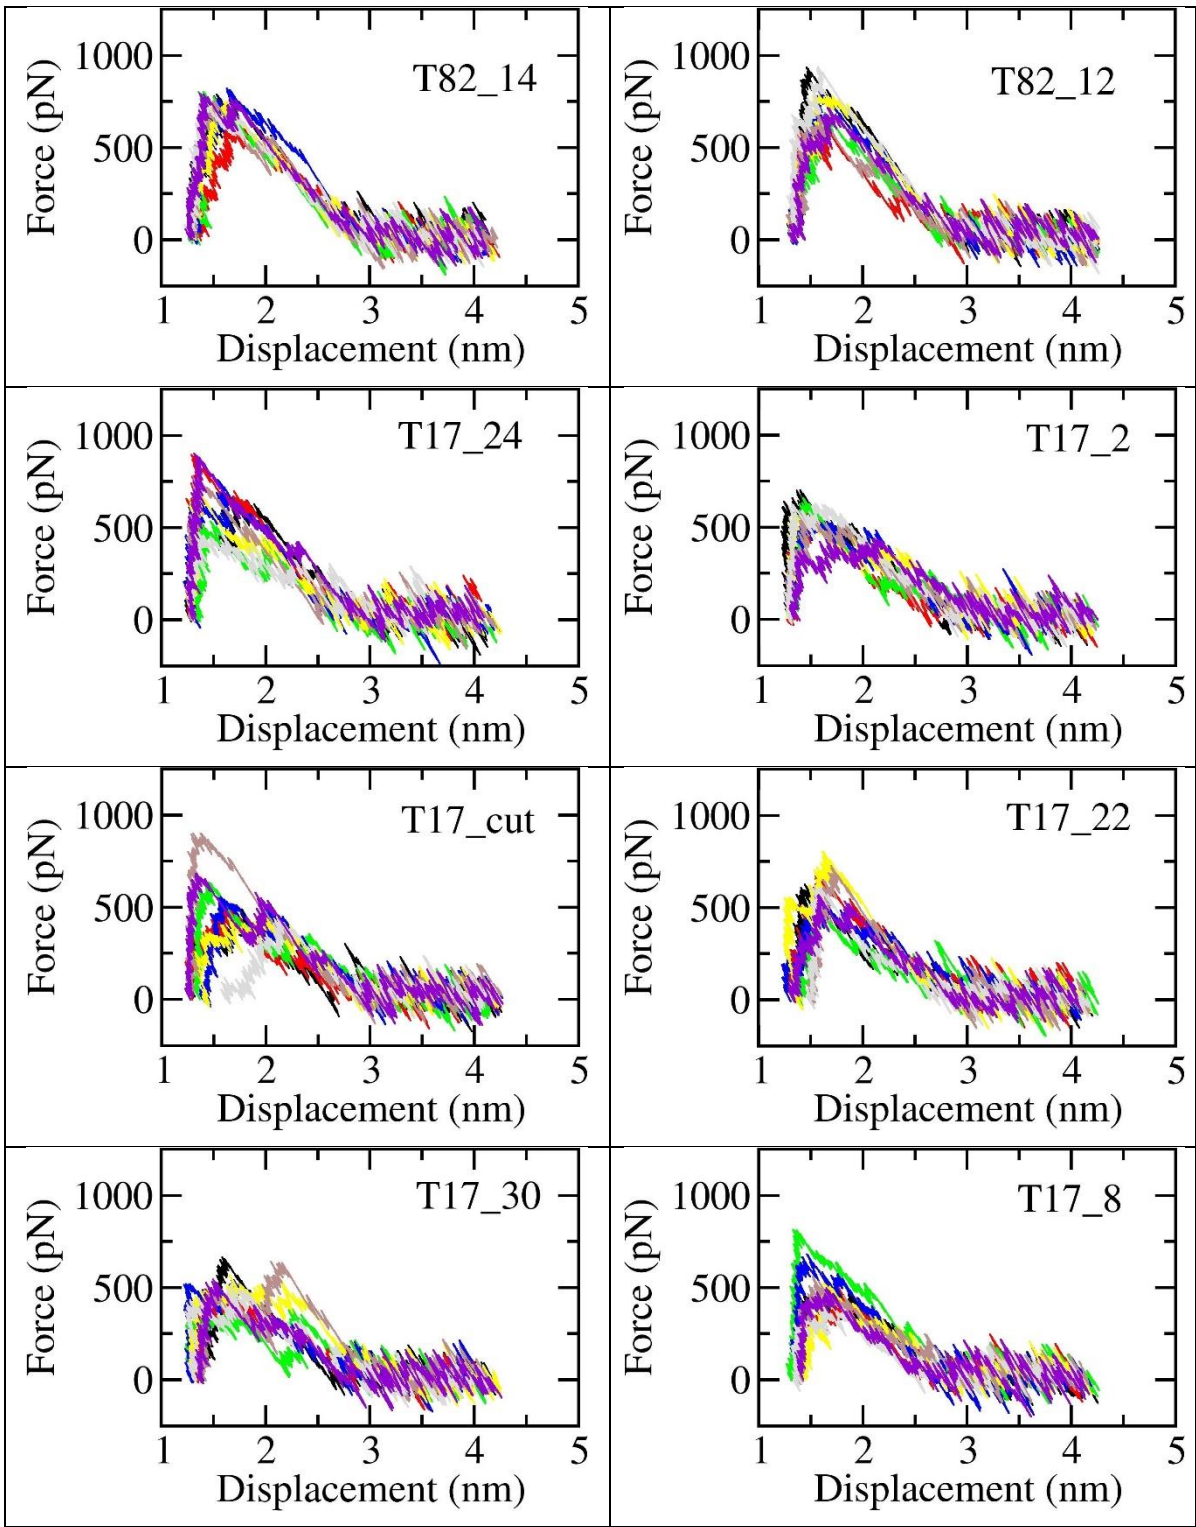

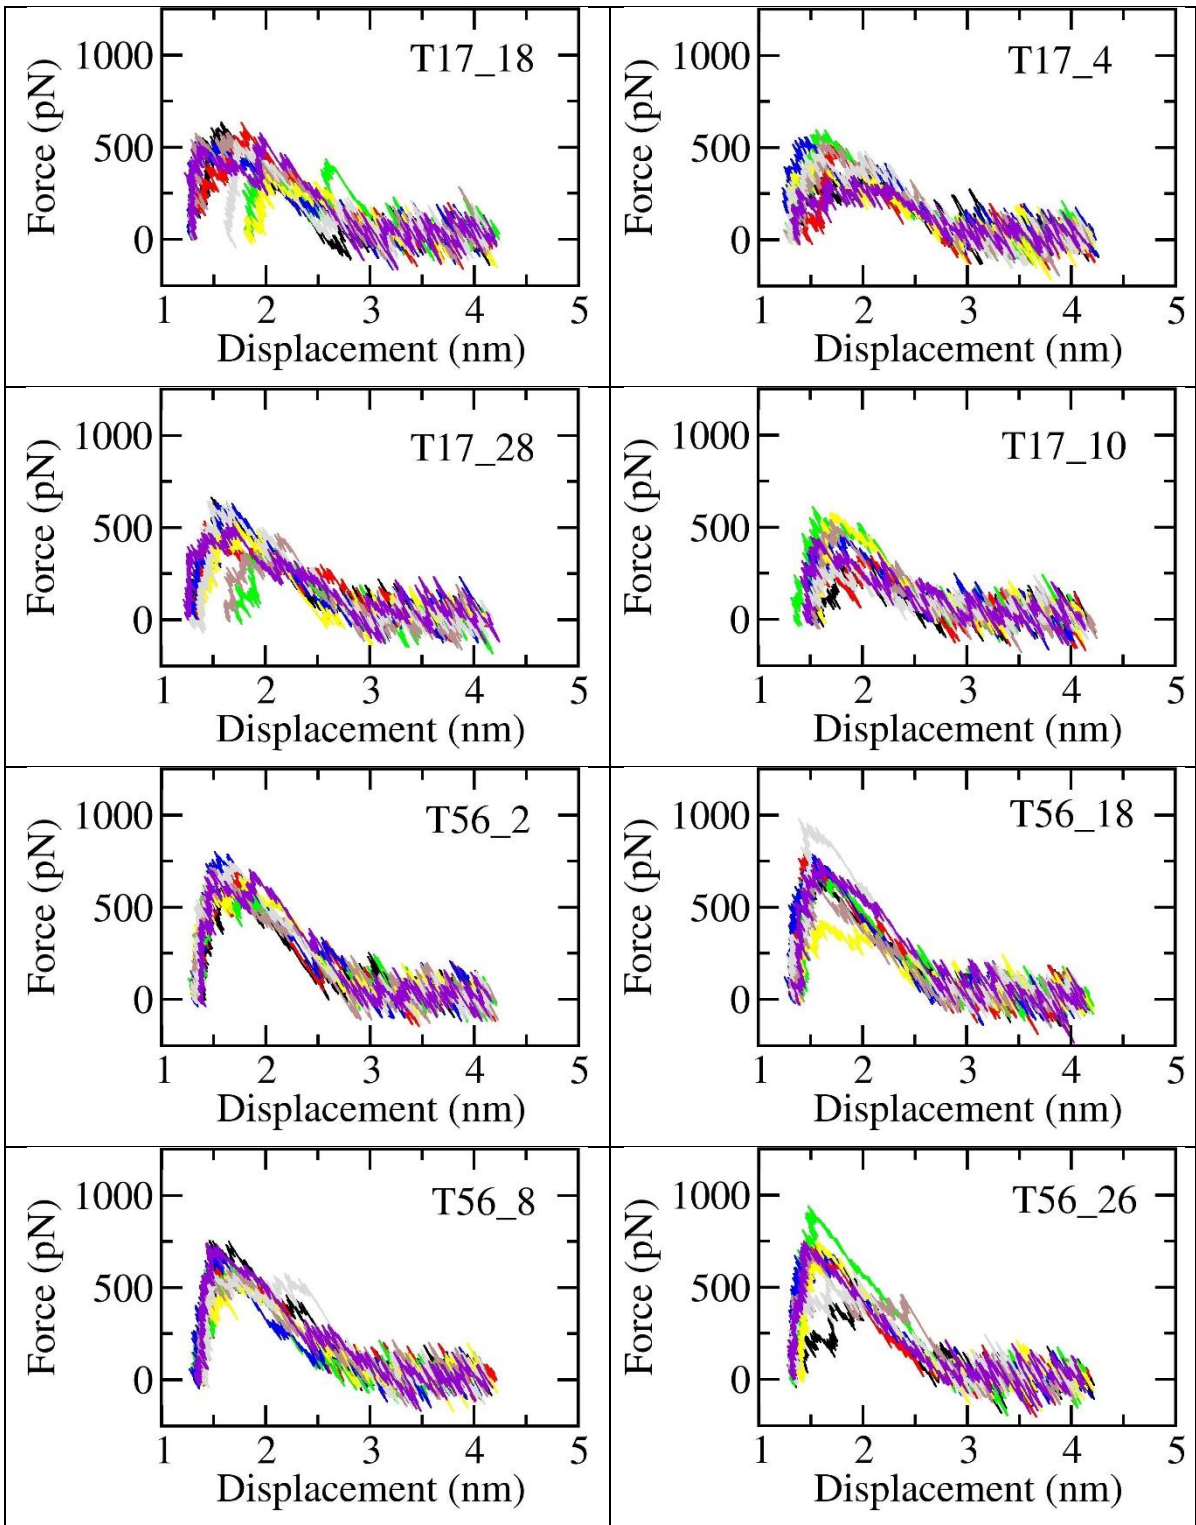

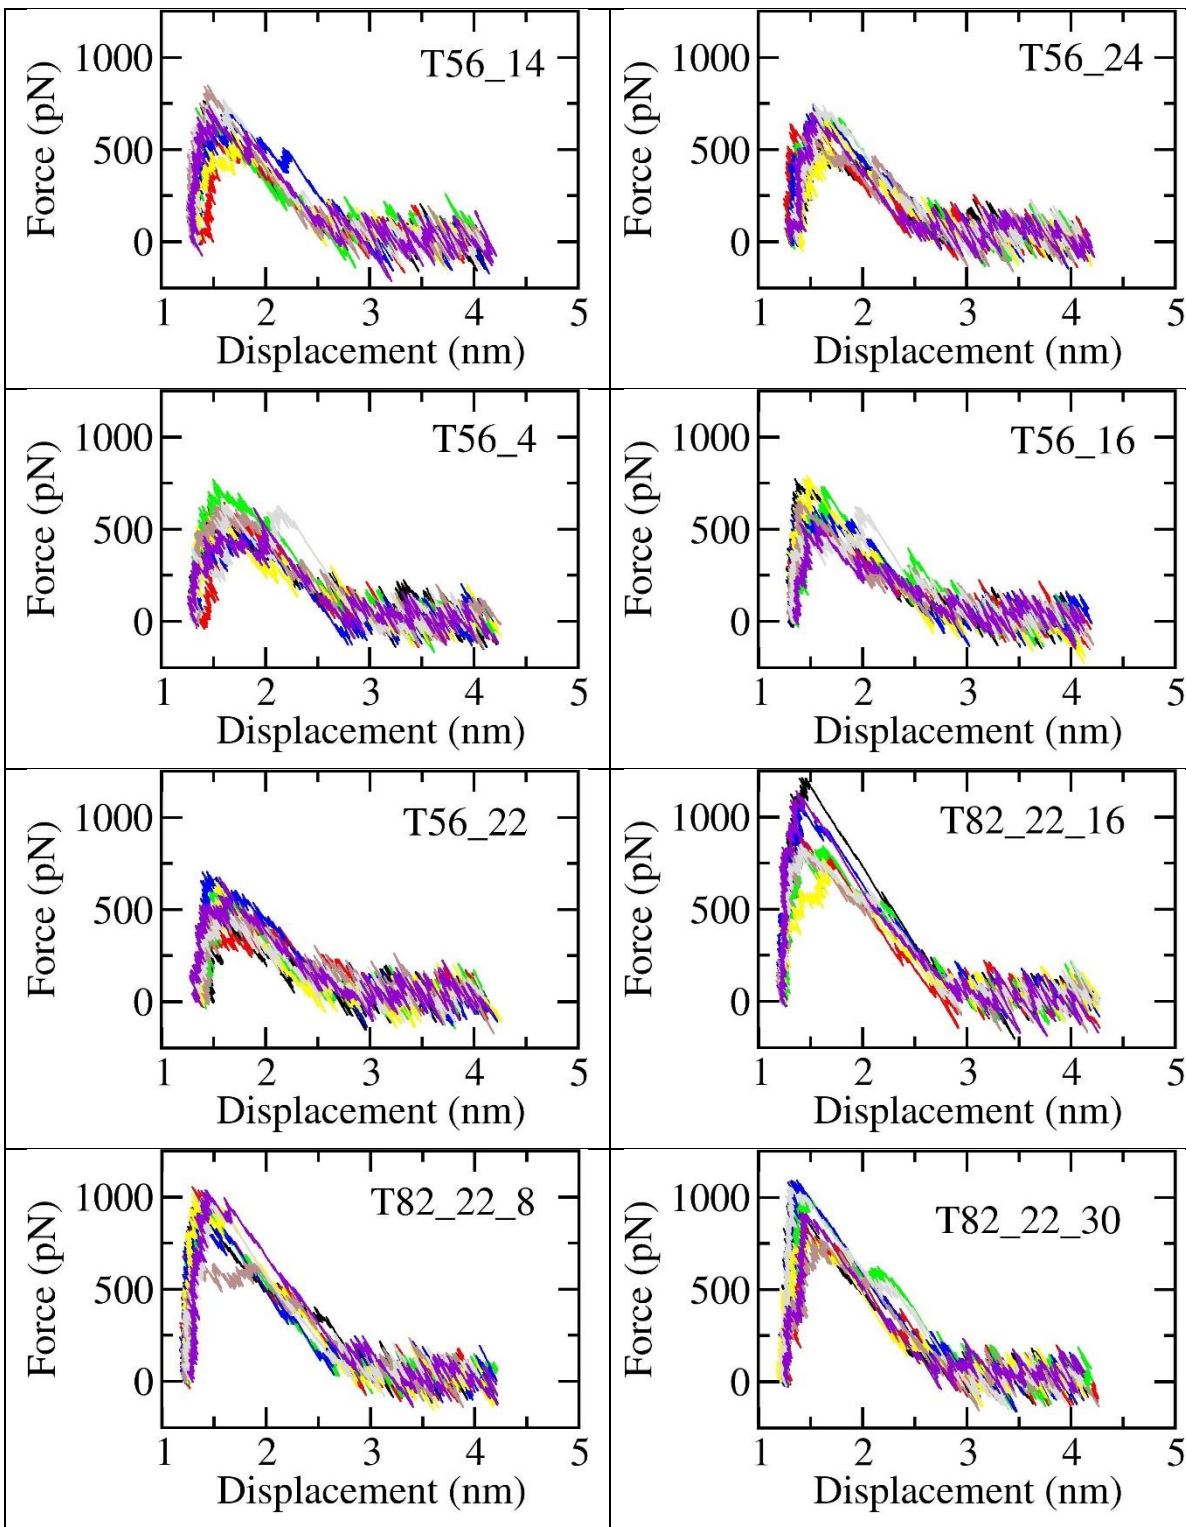

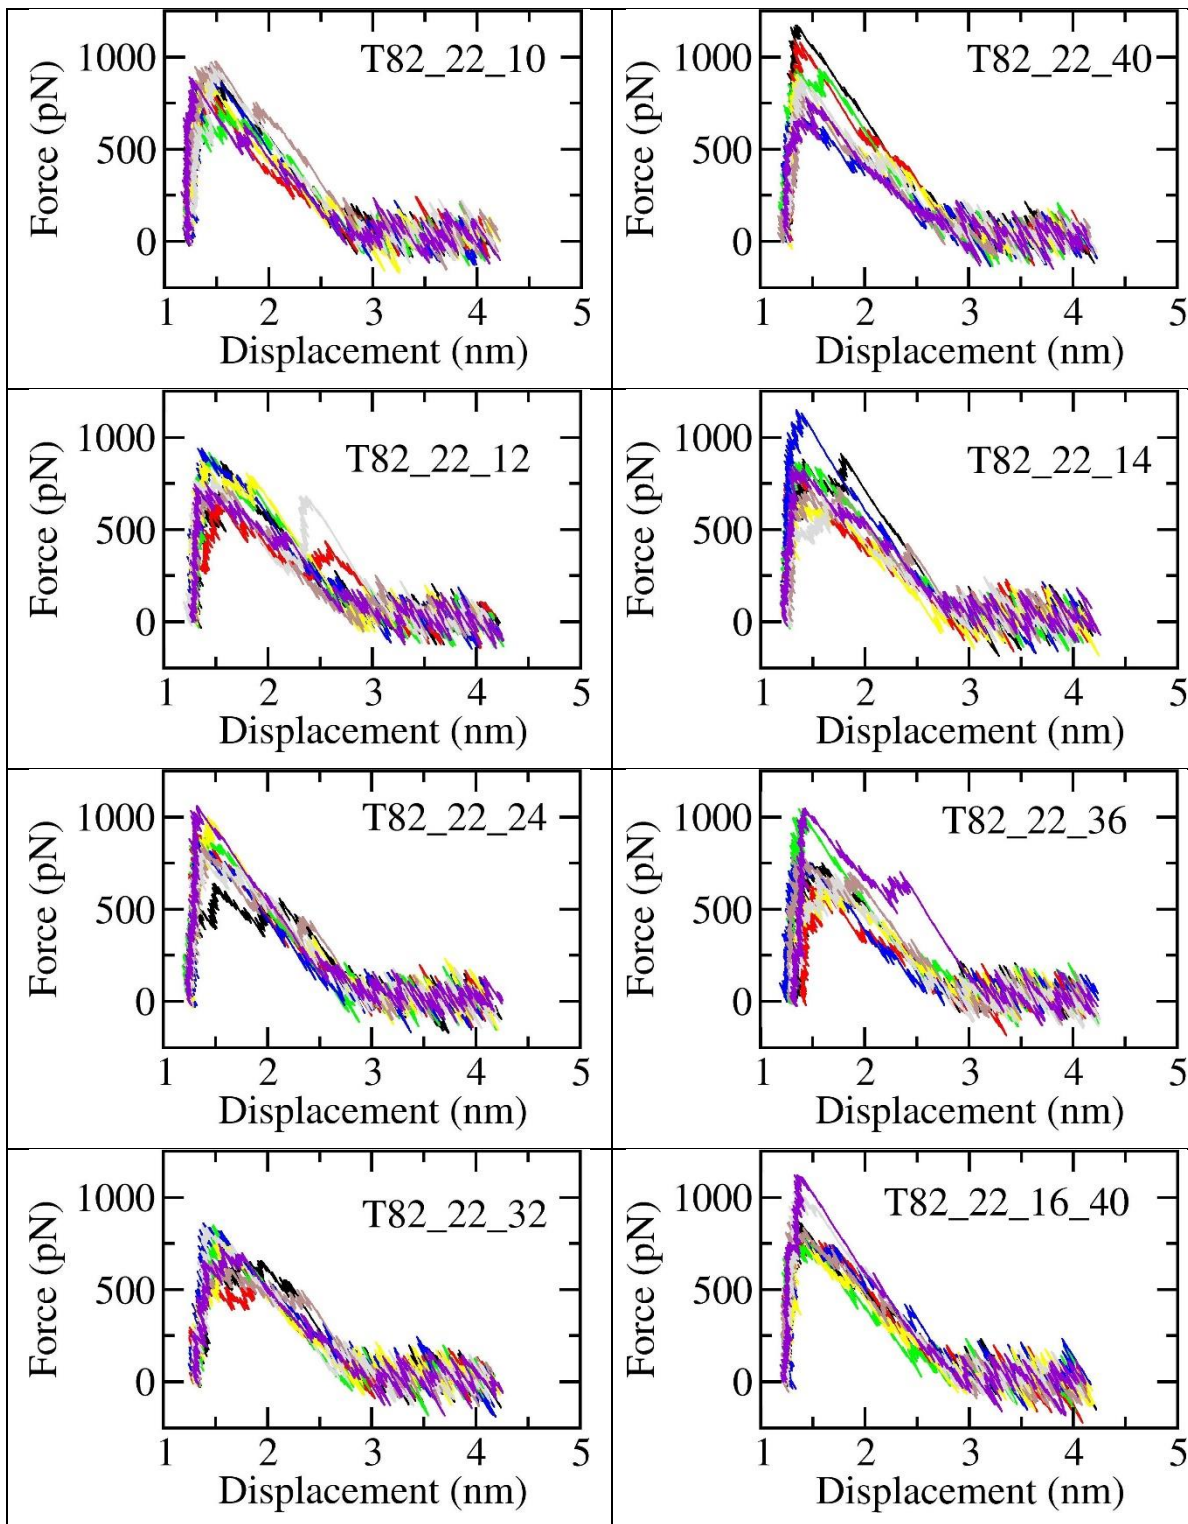



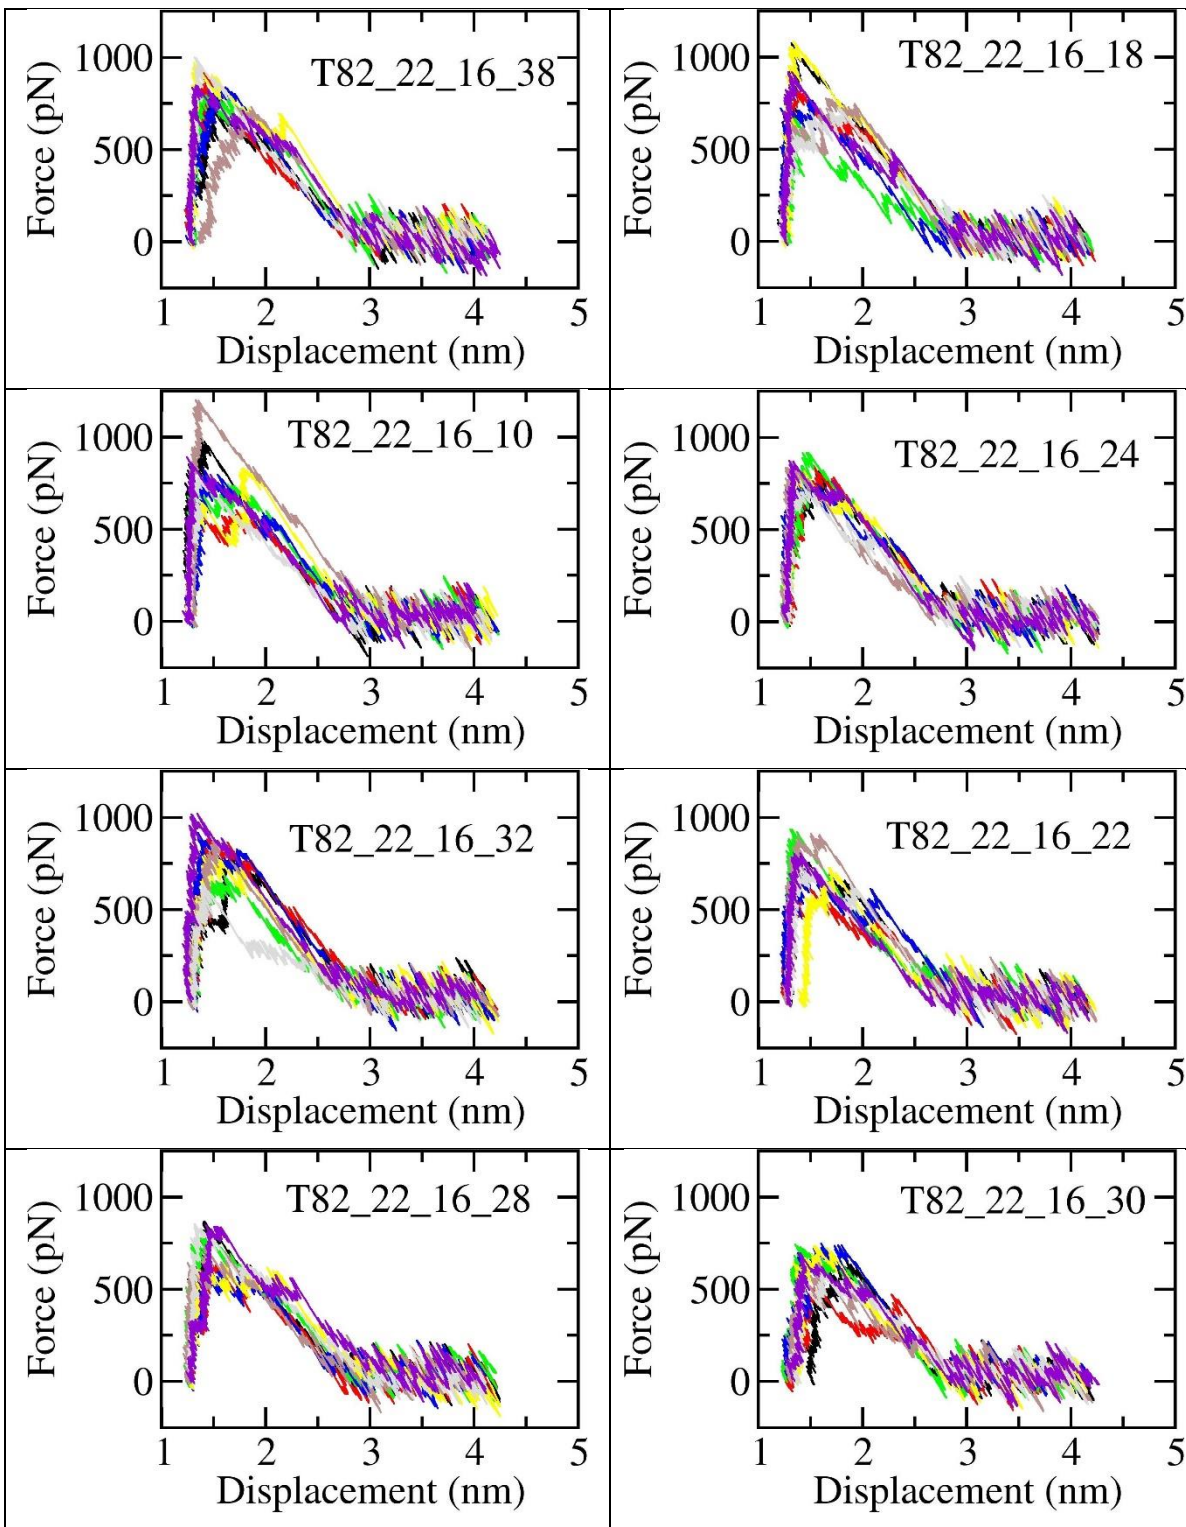

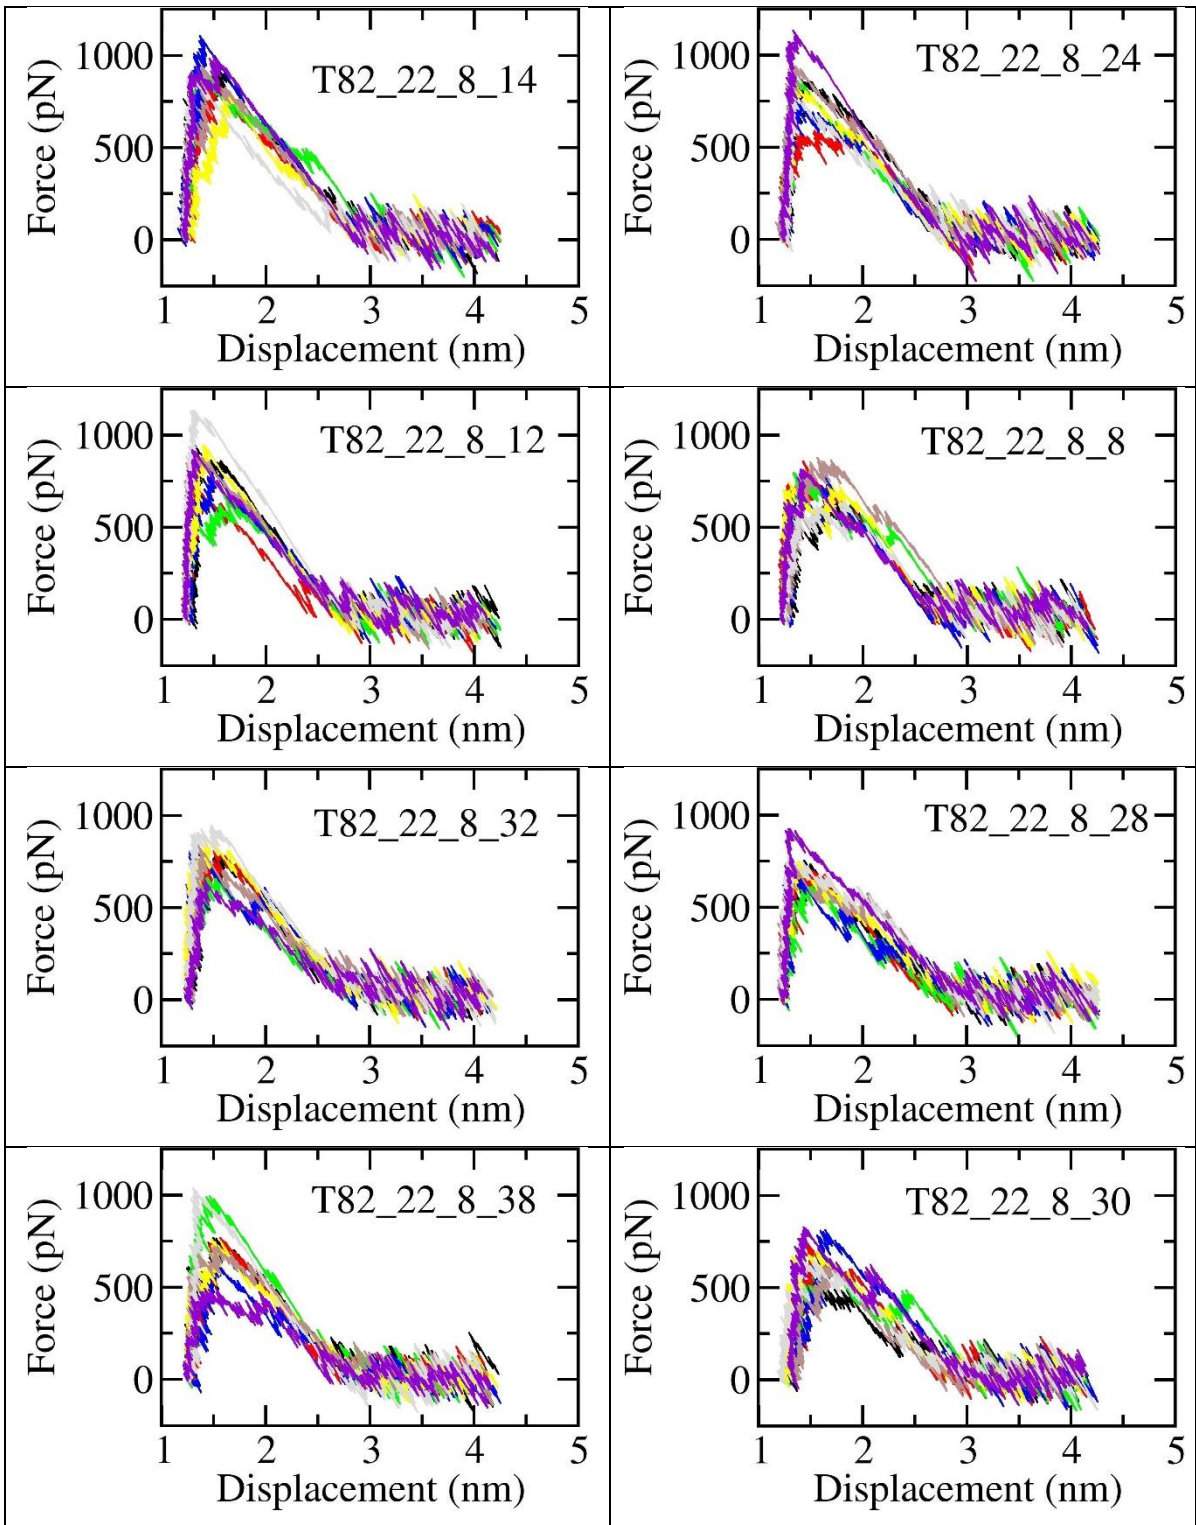

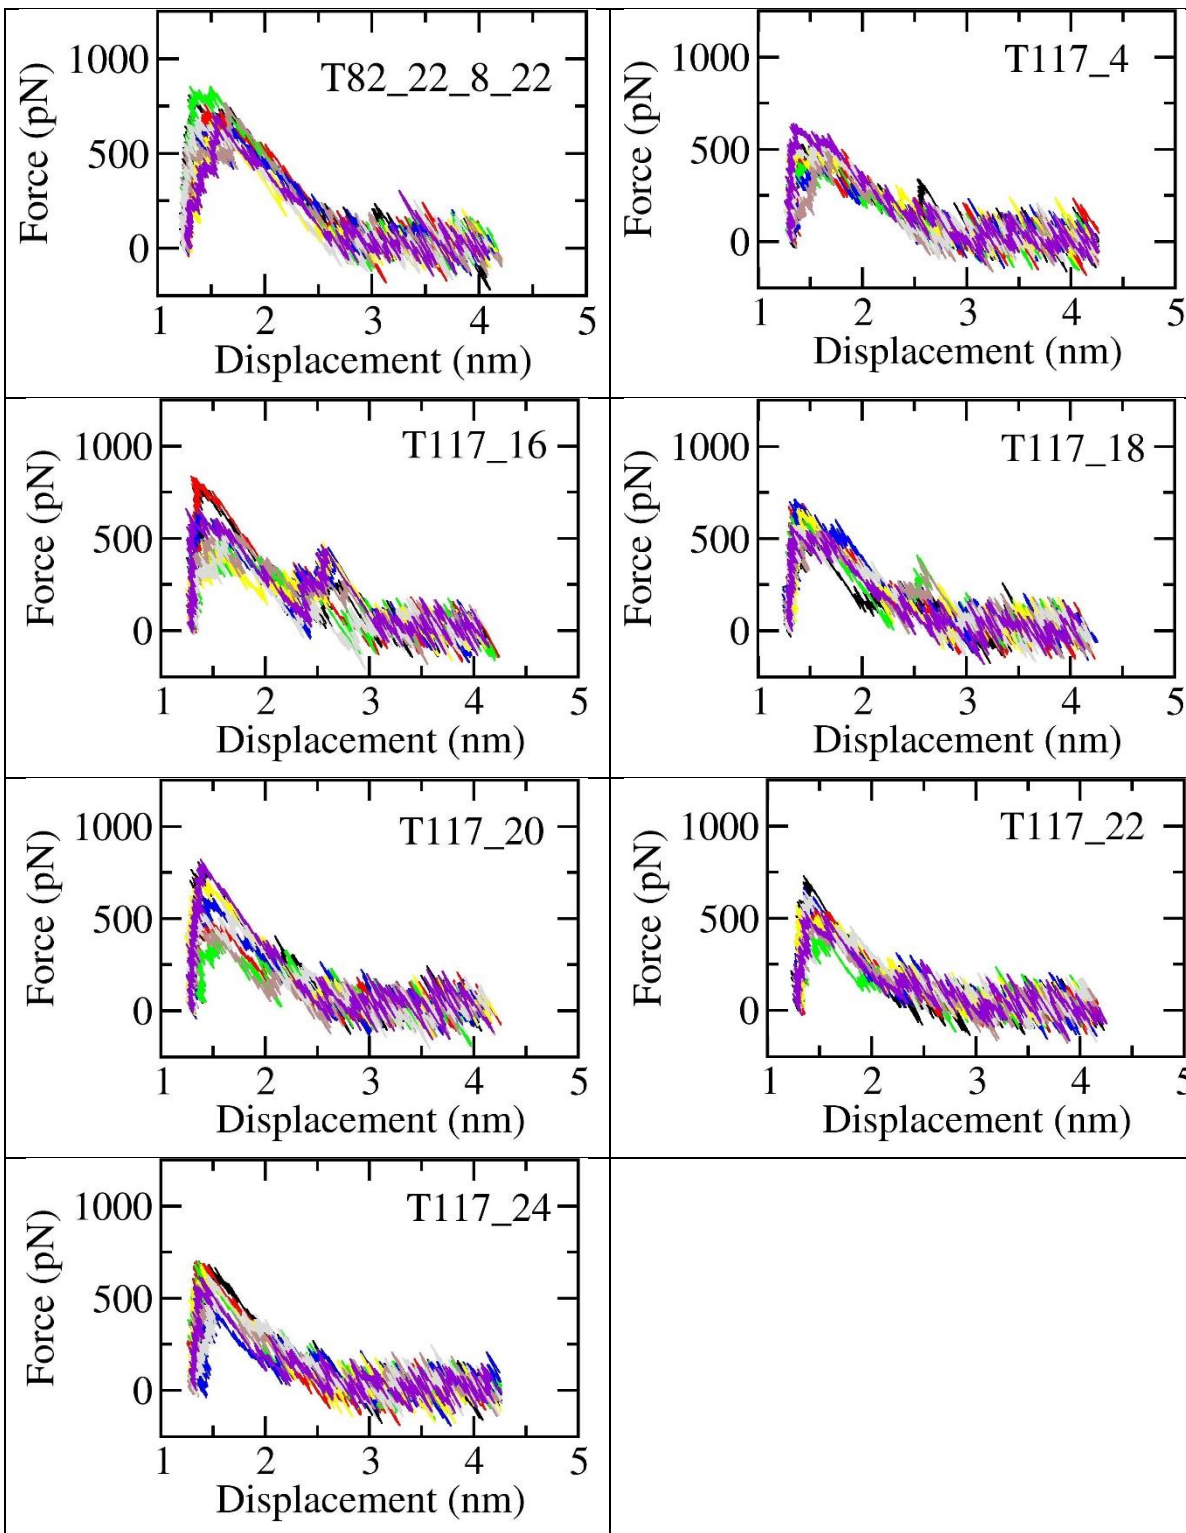

**Table S4.** MD-refined Structures of SARS-CoV-2 Mpro + Modified Compounds.

| Nº | Compound | MD-refined structure |
|----|----------|----------------------|
| 1  | T82_22   |                      |
| 2  | T82_32   |                      |
| 3  | T82_24   |                      |
| 4  | T82_34   |                      |

|   |         |  |
|---|---------|--|
| 5 | T82_cut |  |
| 6 | T82_38  |  |
| 7 | T82_10  |  |
| 8 | T82_14  |  |

|           |                |                                                                                                                                                                                                                                                                                                                                                                                                                                                                  |
|-----------|----------------|------------------------------------------------------------------------------------------------------------------------------------------------------------------------------------------------------------------------------------------------------------------------------------------------------------------------------------------------------------------------------------------------------------------------------------------------------------------|
| <p>9</p>  | <p>T82_12</p>  | 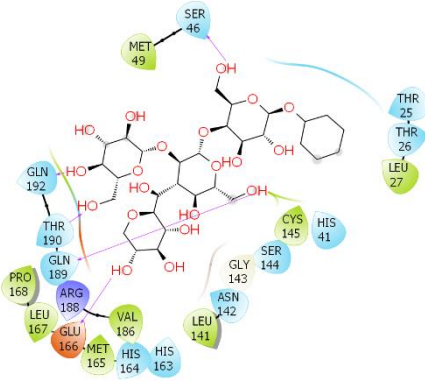 <p>Molecular structure of T82_12 showing interactions with various amino acids. The structure is a complex of three sugar rings. Interacting residues include MET 49, SER 46, THR 25, THR 26, LEU 27, THR 190, GLN 192, THR 189, ARG 188, LEU 167, GLU 166, MET 165, VAL 186, HIS 164, HIS 163, LEU 142, LEU 141, GLY 143, ASN 144, SER 144, CYS 145, HIS 41, and THR 24.</p> |
| <p>10</p> | <p>T17_24</p>  |  <p>Molecular structure of T17_24 showing interactions with various amino acids. The structure is a complex of three sugar rings. Interacting residues include MET 49, SER 46, THR 24, THR 25, THR 26, CYS 145, SER 144, GLY 143, ASN 142, LEU 141, PHE 140, HIS 163, THR 190, GLN 189, LEU 167, GLU 166, MET 165, HIS 164, HIS 172, and HIS 41.</p>                           |
| <p>11</p> | <p>T17_2</p>   |  <p>Molecular structure of T17_2 showing interactions with various amino acids. The structure is a complex of three sugar rings. Interacting residues include MET 49, SER 46, THR 24, THR 25, THR 26, CYS 145, SER 144, GLY 143, ASN 142, HIS 172, LEU 141, PHE 140, THR 190, GLN 189, HIS 41, THR 45, and GLU 166.</p>                                                       |
| <p>12</p> | <p>T17_cut</p> |  <p>Molecular structure of T17_cut showing interactions with various amino acids. The structure is a complex of three sugar rings. Interacting residues include MET 49, SER 46, HIS 41, CYS 145, SER 144, GLY 143, ASN 142, LEU 141, PHE 140, GLN 189, GLU 166, MET 165, HIS 164, HIS 163, and HIS 172.</p>                                                                  |

|           |               |                                                                                      |
|-----------|---------------|--------------------------------------------------------------------------------------|
| <p>13</p> | <p>T17_22</p> | 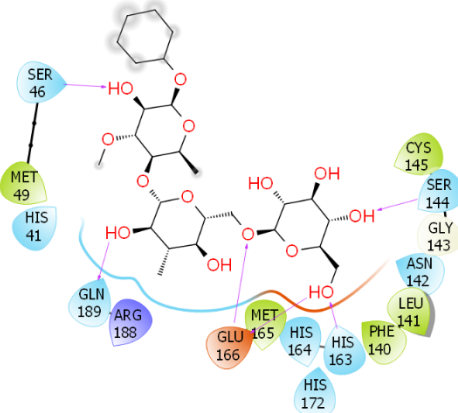   |
| <p>14</p> | <p>T17_30</p> |    |
| <p>15</p> | <p>T17_8</p>  |   |
| <p>16</p> | <p>T17_18</p> |  |

|    |        |  |
|----|--------|--|
| 17 | T17_4  |  |
| 18 | T17_28 |  |
| 19 | T17_10 |  |
| 20 | T56_2  |  |



|           |               |  |
|-----------|---------------|--|
| <p>21</p> | <p>T56_18</p> |  |
| <p>22</p> | <p>T56_8</p>  |  |
| <p>23</p> | <p>T56_26</p> |  |
| <p>24</p> | <p>T56_14</p> |  |

|    |        |  |
|----|--------|--|
| 25 | T56_24 |  |
| 26 | T56_4  |  |
| 27 | T56_16 |  |
| 28 | T56_22 |  |

**Table S5.** MD-refined Structures of SARS-CoV-2 Mpro + Modified Compounds, which were predicted by DeepFrag calculation.

| Nº | Compound  | MD-refined structure |
|----|-----------|----------------------|
| 1  | T82_22_16 |                      |
| 2  | T82_22_8  |                      |
| 3  | T82_22_30 |                      |
| 4  | T82_22_10 |                      |

|   |           |                                                                                                                                                                                                                                                                                                                                                                                                                                                                               |
|---|-----------|-------------------------------------------------------------------------------------------------------------------------------------------------------------------------------------------------------------------------------------------------------------------------------------------------------------------------------------------------------------------------------------------------------------------------------------------------------------------------------|
| 5 | T82_22_40 | <p>Molecular docking diagram for T82_22_40. The ligand is shown in red sticks, and the protein residues are shown as colored spheres. Interactions are indicated by dashed lines. Residues shown include: THR 25, THR 26, LEU 27, MET 49, SER 46, THR 45, CYS 44, HIS 41, ARG 188, GLN 189, THR 190, GLN 192, HIS 163, HIS 164, MET 165, GLU 166, LEU 167, PRO 168, LEU 141, LEU 142, ASN 142, GLY 143, SER 144, CYS 145, and THR 25.</p>                                     |
| 6 | T82_22_12 | <p>Molecular docking diagram for T82_22_12. The ligand is shown in red sticks, and the protein residues are shown as colored spheres. Interactions are indicated by dashed lines. Residues shown include: THR 25, THR 26, LEU 27, MET 49, SER 46, THR 45, CYS 44, HIS 41, VAL 186, ARG 188, GLN 189, THR 190, GLN 192, HIS 163, HIS 164, MET 165, GLU 166, LEU 167, PRO 168, LEU 141, LEU 142, ASN 142, GLY 143, SER 144, CYS 145, and THR 25.</p>                            |
| 7 | T82_22_14 | <p>Molecular docking diagram for T82_22_14. The ligand is shown in red sticks, and the protein residues are shown as colored spheres. Interactions are indicated by dashed lines. Residues shown include: THR 25, THR 26, LEU 27, MET 49, SER 46, THR 45, CYS 44, HIS 41, SER 145, MET 49, HIS 163, HIS 164, MET 165, GLU 166, LEU 167, PRO 168, LEU 141, LEU 142, ASN 142, GLY 143, SER 144, CYS 145, VAL 186, ARG 188, GLN 189, THR 190, GLN 192, THR 190, and THR 189.</p> |
| 8 | T82_22_24 | <p>Molecular docking diagram for T82_22_24. The ligand is shown in red sticks, and the protein residues are shown as colored spheres. Interactions are indicated by dashed lines. Residues shown include: THR 25, THR 26, LEU 27, MET 49, SER 46, THR 45, CYS 44, HIS 41, ARG 188, GLN 189, THR 190, GLN 192, HIS 163, HIS 164, MET 165, GLU 166, LEU 167, PRO 168, LEU 141, LEU 142, ASN 142, GLY 143, SER 144, CYS 145, and THR 25.</p>                                     |

|           |                  |                                                                                    |
|-----------|------------------|------------------------------------------------------------------------------------|
| <p>9</p>  | <p>T82_22_36</p> | 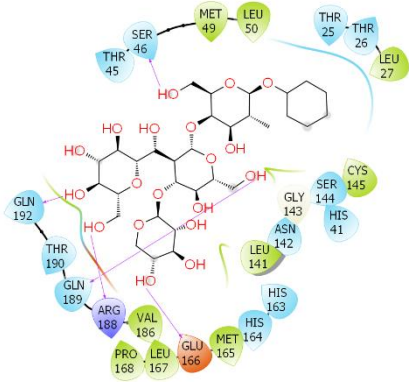 |
| <p>10</p> | <p>T82_22_32</p> |  |

**Table S6.** MD-refined Structures of SARS-CoV-2 Mpro + Modified Compounds, which were suggested by DeepFrag estimations.

| Nº | Compound     | MD-refined structure |
|----|--------------|----------------------|
| 1  | T82_22_16_40 |                      |
| 2  | T82_22_16_38 |                      |
| 3  | T82_22_16_18 |                      |
| 4  | T82_22_16_10 |                      |

|   |              |  |
|---|--------------|--|
| 5 | T82_22_16_24 |  |
| 6 | T82_22_16_32 |  |
| 7 | T82_22_16_22 |  |
| 8 | T82_22_16_28 |  |

|           |                     |                                                                                      |
|-----------|---------------------|--------------------------------------------------------------------------------------|
| <p>9</p>  | <p>T82_22_16_30</p> | 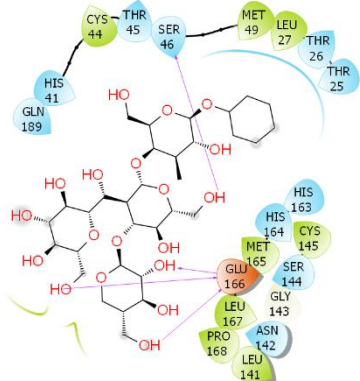   |
| <p>10</p> | <p>T82_22_8_14</p>  |    |
| <p>11</p> | <p>T82_22_8_24</p>  |   |
| <p>12</p> | <p>T82_22_8_12</p>  |  |



|    |             |  |
|----|-------------|--|
| 13 | T82_22_8_8  |  |
| 14 | T82_22_8_32 |  |
| 15 | T82_22_8_28 |  |
| 16 | T82_22_8_38 |  |

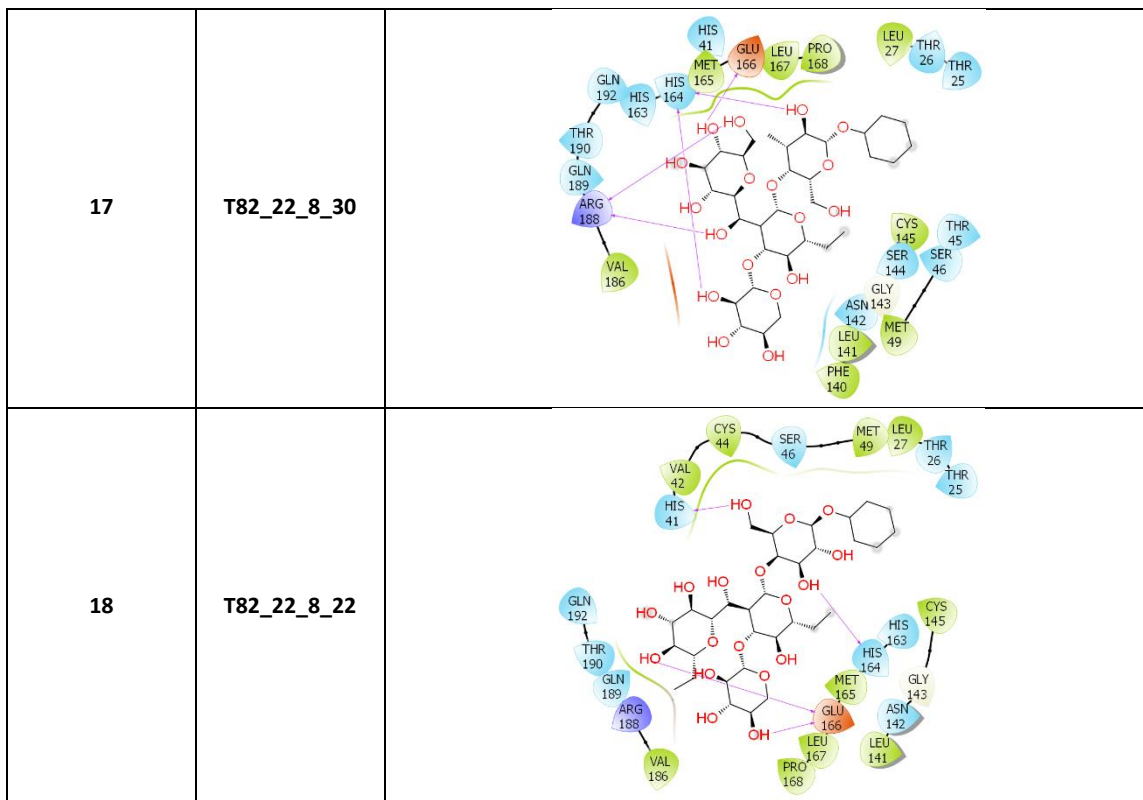

**Table S7.** MD-refined Structures of SARS-CoV-2 Mpro + Modified Compounds, which were suggested by DeepFrag estimations.

| Nº | Compound | MD-refined structure |
|----|----------|----------------------|
| 1  | T117_4   |                      |
| 2  | T117_16  |                      |
| 3  | T117_18  |                      |
| 4  | T117_20  |                      |

|          |                |                                                                                    |
|----------|----------------|------------------------------------------------------------------------------------|
| <p>5</p> | <p>T117_22</p> | 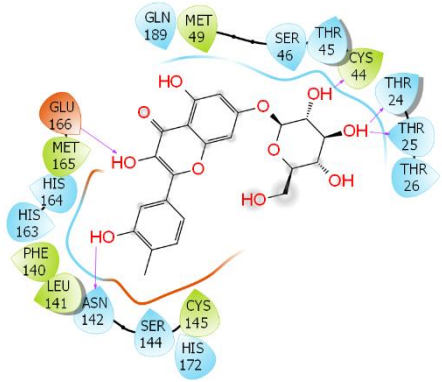 |
| <p>6</p> | <p>T117_24</p> |  |

**Table S8.** The calculated results of 62 modified compounds to SARS-CoV-2 Mpro using DL and FPL calculations.

| N <sup>o</sup> | Compound     | $F_{Max}$    | $W$         | $\Delta G_{FPL}^{Pre}$ <sup>a</sup> | $IC_{50}^{Pre}$ range <sup>b</sup> |
|----------------|--------------|--------------|-------------|-------------------------------------|------------------------------------|
| 1              | T82_22       | 870.8 ± 61.6 | 111.6 ± 6.7 | -11.76                              | Nanomolar                          |
| 2              | T82_32       | 857.9 ± 41.9 | 108.9 ± 3.4 | -11.61                              | Nanomolar                          |
| 3              | T82_24       | 834.0 ± 19.1 | 103.0 ± 2.9 | -11.28                              | High-nanomolar                     |
| 4              | T82_34       | 796.2 ± 48.3 | 97.0 ± 4.9  | -10.94                              | High-nanomolar                     |
| 5              | T82_cut      | 748.3 ± 48.4 | 96.3 ± 5.2  | -10.9                               | High-nanomolar                     |
| 6              | T82_38       | 820.2 ± 38.2 | 95.9 ± 5.2  | -10.88                              | High-nanomolar                     |
| 7              | T82_10       | 797.7 ± 22.1 | 95.0 ± 3.9  | -10.83                              | High-nanomolar                     |
| 8              | T82_14       | 762.9 ± 21.5 | 94.0 ± 3.3  | -10.78                              | High-nanomolar                     |
| 9              | T82_12       | 772.3 ± 38.6 | 90.2 ± 5.1  | -10.56                              | High-nanomolar                     |
| 10             | T17_24       | 713.2 ± 49.9 | 81.2 ± 5.5  | -10.06                              | High-nanomolar                     |
| 11             | T17_2        | 593.1 ± 25.9 | 72.2 ± 2.9  | -9.56                               | Sub-micromolar                     |
| 12             | T17_cut      | 588.1 ± 49.3 | 70.7 ± 6.5  | -9.47                               | Sub-micromolar                     |
| 13             | T17_22       | 625.5 ± 34.1 | 67.7 ± 4.6  | -9.30                               | Sub-micromolar                     |
| 14             | T17_30       | 540.6 ± 28.8 | 65.8 ± 4.0  | -9.19                               | Sub-micromolar                     |
| 15             | T17_8        | 557.4 ± 42.5 | 61.3 ± 4.7  | -8.95                               | Sub-micromolar                     |
| 16             | T17_18       | 536.4 ± 30.0 | 61.0 ± 5.5  | -8.93                               | Sub-micromolar                     |
| 17             | T17_4        | 495.8 ± 26.7 | 59.5 ± 3.2  | -8.84                               | Sub-micromolar                     |
| 18             | T17_28       | 547.5 ± 30.6 | 59.3 ± 5.5  | -8.83                               | Sub-micromolar                     |
| 19             | T17_10       | 460.1 ± 35.5 | 46.7 ± 3.9  | -8.13                               | Micromolar                         |
| 20             | T56_2        | 705.2 ± 18.9 | 87.9 ± 2.6  | -10.43                              | High-nanomolar                     |
| 21             | T56_18       | 717.4 ± 51.6 | 81.8 ± 5.3  | -10.09                              | High-nanomolar                     |
| 22             | T56_8        | 655.1 ± 22.9 | 79.7 ± 3.4  | -9.98                               | High-nanomolar                     |
| 23             | T56_26       | 713.9 ± 39.0 | 79.0 ± 3.8  | -9.94                               | Sub-micromolar                     |
| 24             | T56_14       | 720.0 ± 26.1 | 76.5 ± 3.5  | -9.80                               | Sub-micromolar                     |
| 25             | T56_24       | 665.2 ± 23.5 | 74.6 ± 2.5  | -9.69                               | Sub-micromolar                     |
| 26             | T56_4        | 619.5 ± 23.5 | 74.3 ± 3.7  | -9.68                               | Sub-micromolar                     |
| 27             | T56_16       | 665.3 ± 29.5 | 74.2 ± 2.5  | -9.67                               | Sub-micromolar                     |
| 28             | T56_22       | 583.4 ± 30.0 | 60.7 ± 3.3  | -8.91                               | Sub-micromolar                     |
| 29             | T82_22_16    | 953.0 ± 54.0 | 121.6 ± 6.1 | -12.32                              | Nanomolar                          |
| 30             | T82_22_8     | 940.4 ± 44.8 | 120.8 ± 2.7 | -12.28                              | Nanomolar                          |
| 31             | T82_22_30    | 930.1 ± 39.7 | 112.4 ± 5.8 | -11.81                              | Nanomolar                          |
| 32             | T82_22_10    | 881.9 ± 25.3 | 108.6 ± 3.9 | -11.59                              | Nanomolar                          |
| 33             | T82_22_40    | 919.0 ± 47.6 | 108.5 ± 5.8 | -11.59                              | Nanomolar                          |
| 34             | T82_22_12    | 818.3 ± 30.5 | 107.8 ± 3.6 | -11.55                              | Nanomolar                          |
| 35             | T82_22_14    | 835.6 ± 50.8 | 105.9 ± 5.2 | -11.44                              | Nanomolar                          |
| 36             | T82_22_24    | 880.4 ± 41.2 | 105.5 ± 2.9 | -11.42                              | Nanomolar                          |
| 37             | T82_22_36    | 797.9 ± 53.7 | 98.9 ± 8.2  | -11.05                              | High-nanomolar                     |
| 38             | T82_22_32    | 752.6 ± 30.8 | 93.9 ± 3.2  | -10.77                              | High-nanomolar                     |
| 39             | T82_22_16_40 | 888.7 ± 39.8 | 109.7 ± 5.4 | -11.65                              | Nanomolar                          |
| 40             | T82_22_16_38 | 856.3 ± 33.1 | 106.9 ± 4.0 | -11.50                              | Nanomolar                          |
| 41             | T82_22_16_18 | 856.3 ± 50.3 | 106.8 ± 6.6 | -11.49                              | Nanomolar                          |
| 42             | T82_22_16_10 | 855.6 ± 58.7 | 105.2 ± 6.8 | -11.40                              | Nanomolar                          |
| 43             | T82_22_16_24 | 836.1 ± 17.6 | 103.3 ± 2.1 | -11.30                              | High-nanomolar                     |
| 44             | T82_22_16_32 | 828.1 ± 39.9 | 98.3 ± 6.5  | -11.02                              | High-nanomolar                     |
| 45             | T82_22_16_22 | 794.9 ± 30.6 | 95.2 ± 4.6  | -10.84                              | High-nanomolar                     |
| 46             | T82_22_16_28 | 749.4 ± 34.8 | 94.6 ± 4.3  | -10.81                              | High-nanomolar                     |
| 47             | T82_22_16_30 | 672.4 ± 25.0 | 82.2 ± 2.6  | -10.12                              | High-nanomolar                     |
| 48             | T82_22_8_14  | 931.1 ± 28.6 | 117.0 ± 5.2 | -12.06                              | Nanomolar                          |
| 49             | T82_22_8_24  | 860.1 ± 45.3 | 107.6 ± 4.8 | -11.54                              | Nanomolar                          |
| 50             | T82_22_8_12  | 883.2 ± 45.7 | 100.1 ± 6.0 | -11.12                              | High-nanomolar                     |
| 51             | T82_22_8_8   | 763.3 ± 30.2 | 99.6 ± 4.2  | -11.09                              | High-nanomolar                     |
| 52             | T82_22_8_32  | 804.1 ± 32.2 | 99.1 ± 5.0  | -11.06                              | High-nanomolar                     |
| 53             | T82_22_8_28  | 750.7 ± 26.0 | 91.1 ± 4.6  | -10.61                              | High-nanomolar                     |
| 54             | T82_22_8_38  | 769.5 ± 57.9 | 90.7 ± 6.1  | -10.59                              | High-nanomolar                     |
| 55             | T82_22_8_30  | 698.6 ± 30.6 | 85.8 ± 4.4  | -10.32                              | High-nanomolar                     |
| 56             | T82_22_8_22  | 737.2 ± 22.2 | 85.5 ± 4.5  | -10.30                              | High-nanomolar                     |
| 57             | T117_16      | 630.3 ± 41.6 | 72.0 ± 4.9  | -9.54                               | Sub-micromolar                     |
| 58             | T117_18      | 610.2 ± 25.1 | 65.9 ± 3.1  | -9.20                               | Sub-micromolar                     |
| 59             | T117_20      | 621.2 ± 49.1 | 61.3 ± 4.7  | -8.94                               | Sub-micromolar                     |
| 60             | T117_4       | 541.1 ± 17.2 | 60.7 ± 3.0  | -8.91                               | Sub-micromolar                     |
| 61             | T117_22      | 582.7 ± 31.5 | 56.0 ± 2.2  | -8.64                               | Sub-micromolar                     |
| 62             | T117_24      | 627.9 ± 26.2 | 55.3 ± 2.4  | -8.61                               | Sub-micromolar                     |

<sup>a</sup>The predicted binding free energy  $\Delta G_{FPL}^{Pre} = -0.056 \times W - 5.512$ .<sup>1</sup> <sup>b</sup>The predicted  $IC_{50}^{Pre}$  was calculated via formula  $IC_{50}^{Pre} = e^{(\Delta G_{FPL}^{Pre}/RT)}$  using hypothesis that  $IC_{50}$  equals to inhibition constant  $k_i$ . The calculated error is the standard error of the average (SE). The unit of force and energy in pN and kcal mol<sup>-1</sup>, respectively.

**Table S9.** The permeability/solubility of the top-lead compounds in Table 1, which formed form sub-micromolar to nanomolar affinities.

| N <sup>o</sup> | Code | Pubchem ID | Name           | LogP <sup>a</sup> | IC <sub>50</sub> <sup>Pre</sup> range <sup>b</sup> |
|----------------|------|------------|----------------|-------------------|----------------------------------------------------|
| 1              | T82  | 28523      | Tomatine       | -0.7              | Nanomolar                                          |
| 2              | T17  | 159331     | Thevetine      | -1.6              | High-nanomolar                                     |
| 3              | T56  | 10175330   | Tribuloside    | 2.5               | High-nanomolar                                     |
| 4              | T117 | 5282160    | Quercimeritrin | 0.4               | Sub-micromolar                                     |
| 5              | T25  | 31310      | Scillaren      | -0.3              | Sub-micromolar                                     |
| 6              | T61  | 73568      | Corilagin      | 0.1               | Sub-micromolar                                     |
| 7              | T44  | 6325292    | Gomphrenin III | 0.9               | Sub-micromolar                                     |
| 8              | T26  | 222154     | Proscillaridin | 1.9               | Sub-micromolar                                     |
| 9              | T33  | 185586     | Melianotriol   | 5.0               | Sub-micromolar                                     |
| 10             | T52  | 441840     | Adynerin       | 3.1               | Sub-micromolar                                     |
| 11             | T24  | 5317157    | Equisetrin     | -1.4              | Sub-micromolar                                     |
| 12             | T3   | 5281627    | Hinokiflavone  | 4.4               | Sub-micromolar                                     |
| 13             | T202 | 441295     | Ginkgolide C   | -1.4              | Sub-micromolar                                     |
| 14             | T55  | 5316647    | Cynarine       | 1.5               | Sub-micromolar                                     |
| 15             | T126 | 5280805    | Rutin          | -1.3              | Sub-micromolar                                     |
| 16             | T34  | 185617     | Scutellarin    | 0.8               | Sub-micromolar                                     |
| 17             | T19  | 10028469   | Melianodiol    | 4.7               | Sub-micromolar                                     |

<sup>a</sup>logP of the compounds was obtained from PubChem database.

**Table S11.** The PreADMET results of 62 designed inhibitors.

| Nº | Compound     | HIA (%) | LogP  | Carcino (Rat) |
|----|--------------|---------|-------|---------------|
| 1  | T82_22       | 0.00    | -5.66 | negative      |
| 2  | T82_32       | 0.39    | -3.94 | negative      |
| 3  | T82_24       | 0.00    | -5.52 | negative      |
| 4  | T82_34       | 0.39    | -3.92 | negative      |
| 5  | T82_cut      | 0.03    | -4.95 | negative      |
| 6  | T82_38       | 0.39    | -3.94 | negative      |
| 7  | T82_10       | 0.06    | -5.05 | negative      |
| 8  | T82_14       | 0.00    | -5.25 | negative      |
| 9  | T82_12       | 0.00    | -5.66 | negative      |
| 10 | T17_24       | 8.07    | -1.33 | negative      |
| 11 | T17_2        | 5.10    | -1.84 | negative      |
| 12 | T17_cut      | 3.51    | -2.35 | negative      |
| 13 | T17_22       | 8.07    | -1.32 | negative      |
| 14 | T17_30       | 5.10    | -1.70 | negative      |
| 15 | T17_8        | 2.46    | -2.78 | negative      |
| 16 | T17_18       | 8.07    | -1.33 | negative      |
| 17 | T17_4        | 5.10    | -2.09 | negative      |
| 18 | T17_28       | 8.07    | -1.33 | negative      |
| 19 | T17_10       | 2.46    | -2.91 | negative      |
| 20 | T56_2        | 39.28   | 1.09  | negative      |
| 21 | T56_18       | 39.30   | 1.23  | negative      |
| 22 | T56_8        | 64.13   | 2.55  | negative      |
| 23 | T56_26       | 73.73   | 2.69  | negative      |
| 24 | T56_14       | 74.03   | 2.57  | negative      |
| 25 | T56_24       | 73.73   | 2.69  | negative      |
| 26 | T56_4        | 61.18   | 2.11  | negative      |
| 27 | T56_16       | 73.73   | 2.68  | negative      |
| 28 | T56_22       | 74.03   | 2.57  | negative      |
| 29 | T82_22_16    | 0.00    | -5.76 | negative      |
| 30 | T82_22_8     | 0.17    | -4.23 | negative      |
| 31 | T82_22_30    | 0.17    | -4.63 | negative      |
| 32 | T82_22_10    | 0.17    | -4.63 | negative      |
| 33 | T82_22_40    | 0.17    | -4.44 | negative      |
| 34 | T82_22_12    | 0.00    | -6.35 | negative      |
| 35 | T82_22_14    | 0.00    | -5.95 | negative      |
| 36 | T82_22_24    | 0.17    | -4.23 | negative      |
| 37 | T82_22_36    | 0.17    | -4.64 | negative      |
| 38 | T82_22_32    | 0.17    | -4.63 | negative      |
| 39 | T82_22_16_40 | 0.22    | -4.17 | negative      |
| 40 | T82_22_16_38 | 0.22    | -4.54 | negative      |
| 41 | T82_22_16_18 | 0.22    | -4.74 | negative      |
| 42 | T82_22_16_10 | 0.22    | -4.73 | negative      |
| 43 | T82_22_16_24 | 0.22    | -4.73 | negative      |
| 44 | T82_22_16_32 | 0.22    | -4.32 | negative      |
| 45 | T82_22_16_22 | 0.22    | -4.32 | negative      |
| 46 | T82_22_16_28 | 0.22    | -4.73 | negative      |
| 47 | T82_22_16_30 | 0.22    | -4.73 | negative      |
| 48 | T82_22_8_14  | 0.22    | -4.32 | negative      |
| 49 | T82_22_8_24  | 0.72    | -3.20 | negative      |
| 50 | T82_22_8_12  | 0.00    | -4.52 | negative      |
| 51 | T82_22_8_8   | 0.72    | -3.20 | negative      |
| 52 | T82_22_8_32  | 0.72    | -2.80 | negative      |
| 53 | T82_22_8_28  | 0.72    | -3.20 | negative      |
| 54 | T82_22_8_38  | 0.72    | -3.01 | negative      |
| 55 | T82_22_8_30  | 0.00    | -5.66 | negative      |
| 56 | T82_22_8_22  | 0.39    | -3.94 | negative      |
| 57 | T117_4       | 18.77   | 0.35  | negative      |
| 58 | T117_16      | 27.45   | 0.72  | negative      |
| 59 | T117_18      | 27.72   | 0.35  | negative      |
| 60 | T117_20      | 27.73   | 0.35  | negative      |
| 61 | T117_22      | 27.72   | 0.35  | negative      |
| 62 | T117_24      | 27.72   | 0.61  | negative      |

**Table S11.** The toxicity results of 41 natural compounds, which were reported in Table 1.

| <b>Nº</b> | <b>Compound</b> | <b>Carcino (Rat)</b> |
|-----------|-----------------|----------------------|
| 1         | <b>T82</b>      | negative             |
| 2         | <b>T17</b>      | negative             |
| 3         | <b>T56</b>      | negative             |
| 4         | <b>T117</b>     | negative             |
| 5         | <b>T25</b>      | negative             |
| 6         | <b>T61</b>      | negative             |
| 7         | <b>T44</b>      | negative             |
| 8         | <b>T26</b>      | negative             |
| 9         | <b>T33</b>      | negative             |
| 10        | <b>T52</b>      | negative             |
| 11        | <b>T24</b>      | negative             |
| 12        | <b>T3</b>       | negative             |
| 13        | <b>T202</b>     | negative             |
| 14        | <b>T55</b>      | negative             |
| 15        | <b>T126</b>     | negative             |
| 16        | <b>T34</b>      | negative             |
| 17        | <b>T19</b>      | negative             |
| 18        | <b>T13</b>      | negative             |
| 19        | <b>T121</b>     | negative             |
| 20        | <b>T27</b>      | negative             |
| 21        | <b>T115</b>     | negative             |
| 22        | <b>T182</b>     | negative             |
| 23        | <b>T14</b>      | negative             |
| 24        | <b>W7</b>       | negative             |
| 25        | <b>T179</b>     | negative             |
| 26        | <b>T58</b>      | negative             |
| 27        | <b>T65</b>      | negative             |
| 28        | <b>T35</b>      | negative             |
| 29        | <b>T23</b>      | negative             |
| 30        | <b>T107</b>     | negative             |
| 31        | <b>T20</b>      | negative             |
| 32        | <b>T7</b>       | negative             |
| 33        | <b>T50</b>      | negative             |
| 34        | <b>T180</b>     | negative             |
| 35        | <b>T30</b>      | negative             |
| 36        | <b>T4</b>       | negative             |
| 37        | <b>T8</b>       | negative             |
| 38        | <b>T102</b>     | negative             |
| 39        | <b>T1</b>       | negative             |
| 40        | <b>T82</b>      | negative             |
| 41        | <b>T17</b>      | negative             |



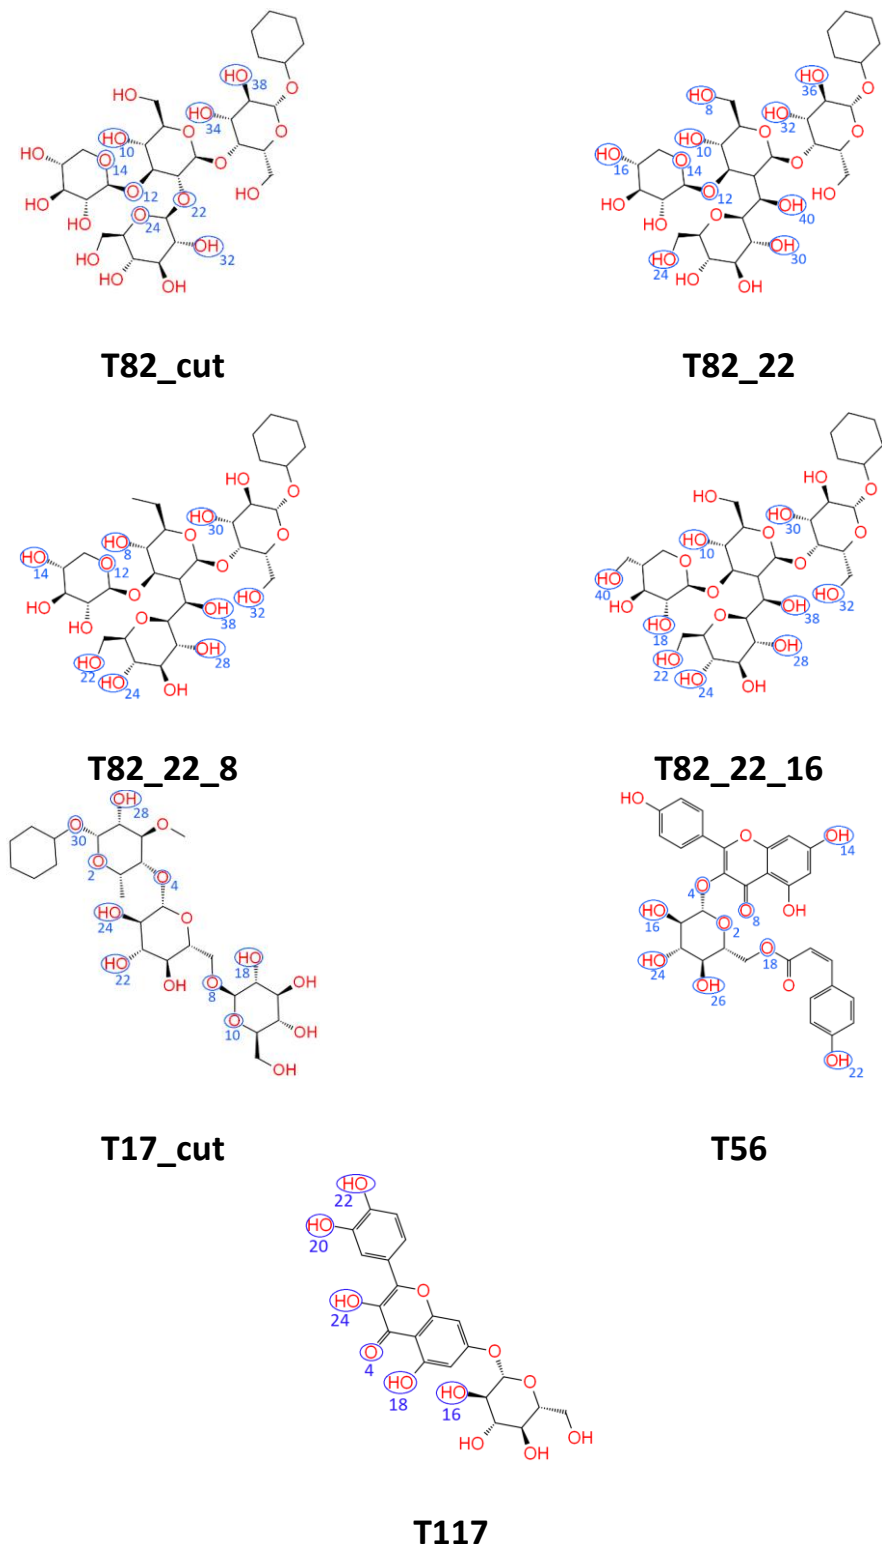

**Figure S1.** The modified positions of the studied compounds, in which the numbers correspond to the atomic index.

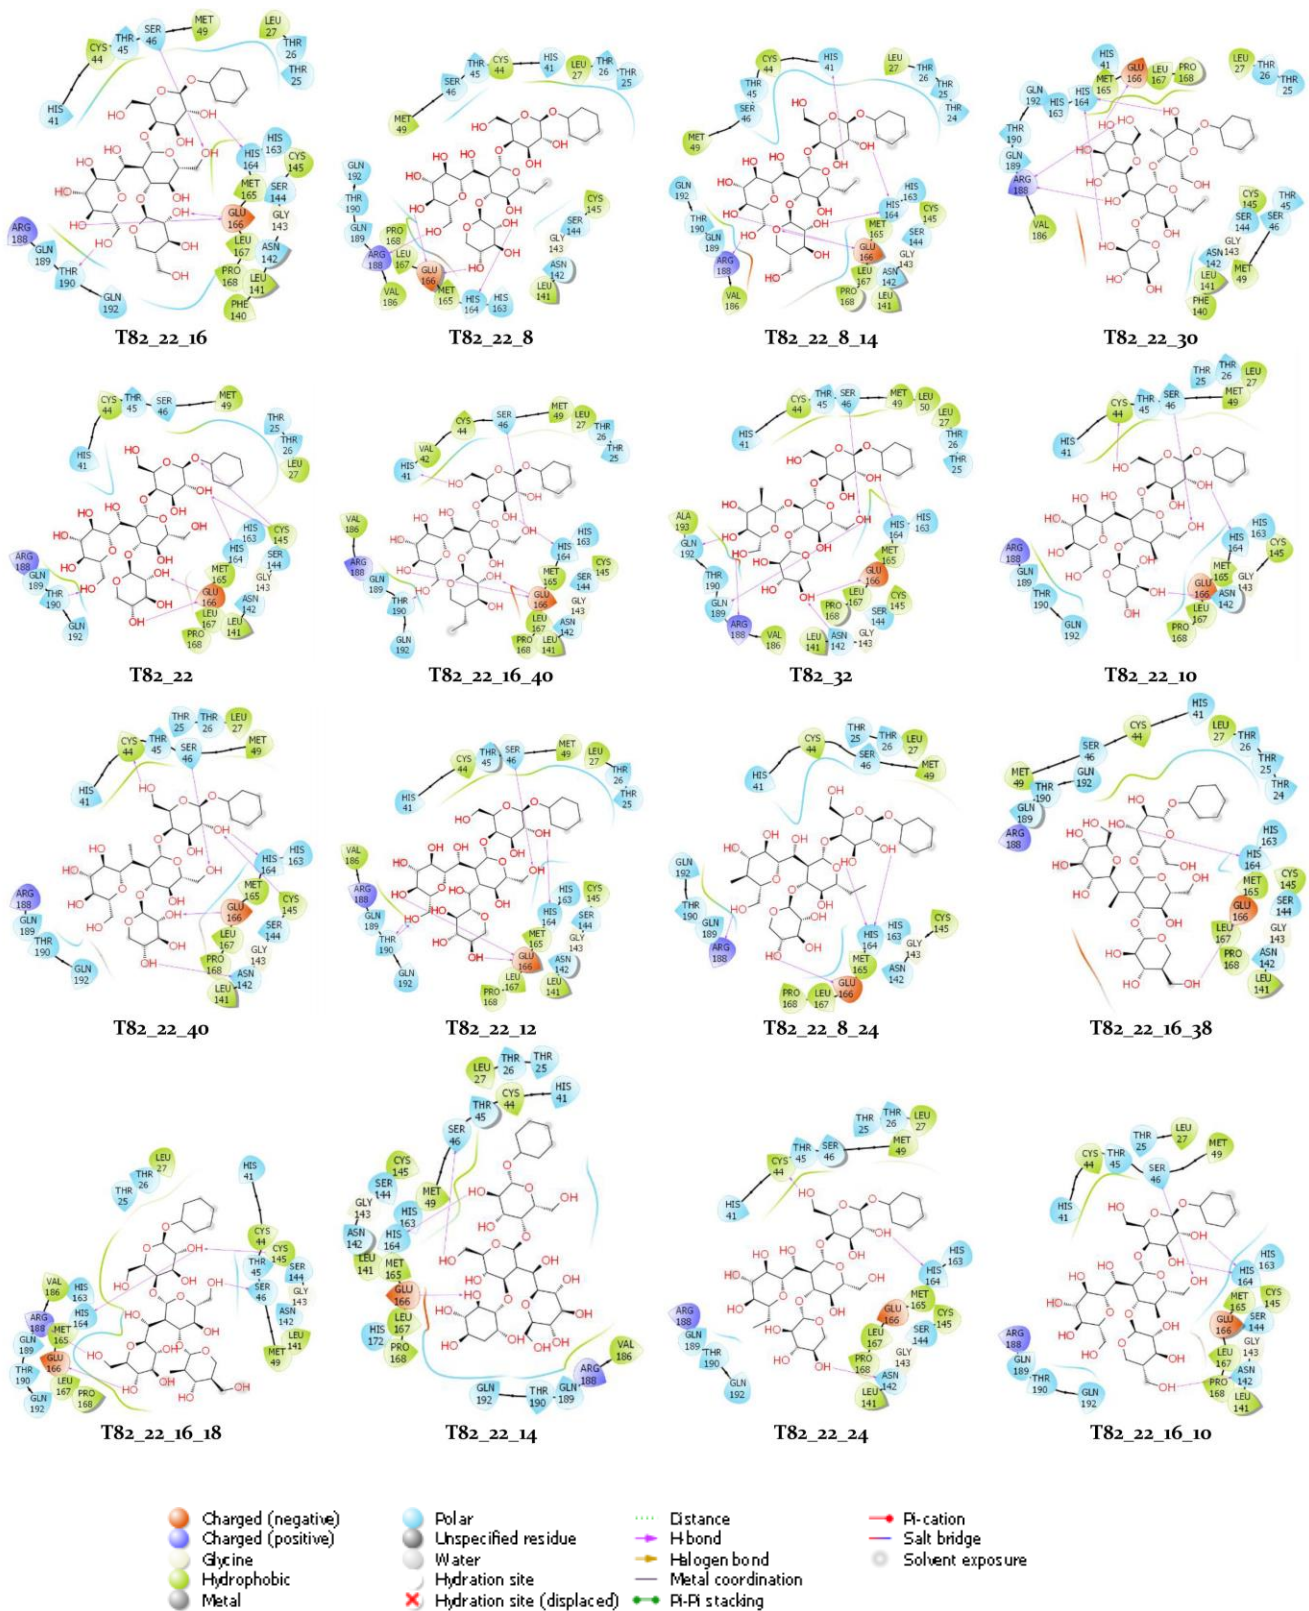

**Figure S2.** 2D interaction diagram of top-lead designed inhibitors to SARS-CoV-2 Mpro. The MD-refined structure of the complexes was obtained using the clustering method with a cutoff of 0.12 nm.

## Reference

1. Pham, M. Q.; Vu, K. B.; Han Pham, T. N.; Thuy Huong, L. T.; Tran, L. H.; Tung, N. T.; Vu, V. V.; Nguyen, T. H.; Ngo, S. T., Rapid prediction of possible inhibitors for SARS-CoV-2 main protease using docking and FPL simulations. *RSC Adv* **2020**, *10* (53), 31991-31996.
